# Supplementary material for: Smoker, ex-smoker or non-smoker? The validity of routinely recorded smoking status in UK primary care: a cross-sectional study
Source: PubMed Central journal article supplement (PMC4010810; doi:10.1136/bmjopen-2014-004958), 2014-04-23
Supplement: bmjopen-2014-004958.draft_revisions.pdf [file bmjopen-2014-004958.draft_revisions.pdf]

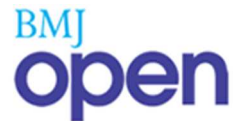

**Smoker, ex-smoker or non-smoker? The validity of routinely recorded smoking status in UK primary care: a cross-sectional study**

|                                 |                                                                                                                                                                                                                                                                                                                                                                                                                                                                                                                                                                                                   |
|---------------------------------|---------------------------------------------------------------------------------------------------------------------------------------------------------------------------------------------------------------------------------------------------------------------------------------------------------------------------------------------------------------------------------------------------------------------------------------------------------------------------------------------------------------------------------------------------------------------------------------------------|
| Journal:                        | <i>BMJ Open</i>                                                                                                                                                                                                                                                                                                                                                                                                                                                                                                                                                                                   |
| Manuscript ID:                  | bmjopen-2014-004958                                                                                                                                                                                                                                                                                                                                                                                                                                                                                                                                                                               |
| Article Type:                   | Research                                                                                                                                                                                                                                                                                                                                                                                                                                                                                                                                                                                          |
| Date Submitted by the Author:   | 30-Jan-2014                                                                                                                                                                                                                                                                                                                                                                                                                                                                                                                                                                                       |
| Complete List of Authors:       | Marston, Louise; University College London, Primary Care and Population Health<br>Carpenter, James; London School of Hygiene & Tropical Medicine, Medical Statistics; MRC Clinical Trials Unit,<br>Walters, Kate; University College London, Primary Care and Population Health<br>Morris, Richard; University College London, Primary Care and Population Health<br>Nazareth, Irwin; University College London, Primary Care and Population Health<br>White, Ian; Medical Research Council, Biostatistics Unit<br>Petersen, Irene; University College London, Primary Care and Population Health |
| <b>Primary Subject Heading</b>: | General practice / Family practice                                                                                                                                                                                                                                                                                                                                                                                                                                                                                                                                                                |
| Secondary Subject Heading:      | Smoking and tobacco, Research methods                                                                                                                                                                                                                                                                                                                                                                                                                                                                                                                                                             |
| Keywords:                       | PRIMARY CARE, STATISTICS & RESEARCH METHODS, EPIDEMIOLOGY                                                                                                                                                                                                                                                                                                                                                                                                                                                                                                                                         |
|                                 |                                                                                                                                                                                                                                                                                                                                                                                                                                                                                                                                                                                                   |

SCHOLARONE™  
Manuscripts

1  
2  
3 **Title: Smoker, ex-smoker or non-smoker? The validity of routinely**  
4 **recorded smoking status in UK primary care: a cross-sectional study**  
5  
6  
7  
8  
9

10 **Authors**

11 Louise Marston<sup>1</sup>

12 James R Carpenter<sup>2, 3</sup>

13 Kate R Walters<sup>1</sup>

14 Richard W Morris<sup>1</sup>

15 Irwin Nazareth<sup>1</sup>,

16 Ian R White<sup>4</sup>

17 Irene Petersen<sup>1</sup>

18  
19  
20  
21  
22  
23  
24  
25  
26  
27  
28  
29  
30  
31  
32 <sup>1</sup>Department of Primary Care and Population Health, University College London,  
33 Rowland Hill Street, London, NW3 2PF, United Kingdom

34  
35  
36 <sup>2</sup>Department of Medical Statistics, London School of Hygiene and Tropical  
37 Medicine, Keppel Street, London, WC1E 7HT, United Kingdom

38  
39  
40  
41 <sup>3</sup> MRC Clinical Trials Unit, Kingsway, London

42  
43  
44 <sup>4</sup>MRC Biostatistics Unit, Cambridge Institute of Public Health, University Forvie  
45 Site, Robinson Way, Cambridge, CB2 0SR, United Kingdom  
46  
47  
48

49  
50 Please address correspondence to:

51 Dr Louise Marston

52  
53  
54  
55 Department of Primary Care and Population Health  
56  
57  
58  
59  
60

1  
2  
3 University College London  
4

5 Rowland Hill Street  
6

7  
8 London  
9

10 NW3 2PF  
11

12 United Kingdom  
13

14  
15  
16  
17  
18 I.marston@ucl.ac.uk  
19

20 Telephone: +44 20 7794 0500 (36768)  
21

22 Fax: +44 20 7794 1224  
23

24  
25  
26 Words: 3,166  
27  
28  
29  
30  
31  
32  
33  
34  
35  
36  
37  
38  
39  
40  
41  
42  
43  
44  
45  
46  
47  
48  
49  
50  
51  
52  
53  
54  
55  
56  
57  
58  
59  
60

**ABSTRACT**

**Objectives:** To investigate how smoking status is recorded in UK primary care; to evaluate if multiple imputation (MI) of smoking status can give results consistent with health surveys.

**Setting:** UK primary care and a population survey conducted in the community.

**Participants:** We identified 354,204 patients aged 16 or over in The Health Improvement Network (THIN) primary care database registered with their general practice 2008-2009 and 15,102 individuals aged 16 or over in the Health Survey for England (HSE).

**Outcome measures:** Age-standardised and, age-specific proportions of smokers, ex-smokers and non-smokers in THIN and the HSE before and after multiple imputation (MI). Using information on time since quitting in the HSE, we extrapolated when ex-smokers may be considered as non-smokers in primary care.

**Results:** In THIN, smoking status was recorded for 84% of patients within one year of registration. Of these; 28% were smokers (21% in the HSE). After MI of missing smoking data, the proportion of smokers was 25% (missing at random) and 20% (missing not at random). With increasing age, more were identified as ex-smokers in the HSE than THIN. It appears that those who quit before the age

1  
2  
3 of 25-30 years were less likely to be recorded as an ex-smoker in primary care  
4  
5 than people who quit later.  
6  
7  
8  
9

10 **Conclusions:** Smoking status is relatively well recorded in primary care.  
11  
12 Misclassification of ex-smokers as non-smokers is likely to occur in those quitting  
13 smoking at an early age and/ or a long time ago. Those with no smoking status  
14 information are more likely to be ex or non-smokers versus smokers.  
15  
16  
17  
18  
19

## 20 21 22 **STRENGTHS AND LIMITATIONS OF THIS STUDY** 23

- 24 • This study includes data from 'real' life primary care electronic records
- 25 • First study to compare the definition of smoking status in primary care
- 26 versus a population survey
- 27 • Study focuses on data recorded in the first year after patient registration
- 28 and may not be applicable to other times.
- 29
- 30
- 31
- 32
- 33
- 34
- 35
- 36
- 37
- 38

39 **KEYWORDS:** recording of smoking, primary care databases, Health Survey for  
40 England, missing data, multiple imputation  
41  
42  
43  
44  
45  
46  
47  
48  
49  
50  
51  
52  
53  
54  
55  
56  
57  
58  
59  
60

## INTRODUCTION

A fifth of the British adult population are smokers [1] and there is still a need for further research into smoking and smoking related diseases including coronary heart disease and stroke, respiratory diseases and cancers. Routinely collected smoking data can be used in clinical practice to identify populations at risk of smoking-related diseases, such as identifying smokers to have spirometry testing to identify those with Chronic Obstructive Pulmonary Disease (COPD), or to be invited for smoking cessation services. It is important to understand the accuracy of the data, and whether cases may be missed in those with no recorded smoking status. Electronic health records, including primary care databases, have proved to be very powerful resources for epidemiological and health research.[2-12] In order to conduct such research, it is important to understand how smoking status is recorded in primary care. There is evidence that the recording of smoking status has improved substantially in UK primary care[13, 14] and most general practices now routinely record smoking status at regular intervals as a part of the Quality Outcome Framework.[15] However, we do not know how the different and non-standardised classifications of ex, non and current smokers in primary care records compare to the standardised recording of smoking status in population surveys such as the Health Survey for England (HSE).

In addition, a proportion of patients still lack a smoking status record in their primary care records. It is unclear how to deal with these patients when

1  
2  
3  
4  
5  
6  
7  
8  
9  
10  
11  
12  
13  
14  
15  
16  
17  
18  
19  
20  
21  
22  
23  
24  
25  
26  
27  
28  
29  
30  
31  
32  
33  
34  
35  
36  
37  
38  
39  
40  
41  
42  
43  
44  
45  
46  
47  
48  
49  
50  
51  
52  
53  
54  
55  
56  
57  
58  
59  
60

conducting research where smoking status is either the outcome of the research or an explanatory factor for patients' health.[3, 6, 16, 17] Methodological research has demonstrated that including only patients with complete records can substantially bias the results.[18] In recent years, efforts have been made to address missing data in primary care databases[3, 17, 19] using multiple imputation, though reporting on the comparability of the results of multiple imputation with population data has been sparse. Therefore, it is unclear whether multiple imputation accurately replicates data representing the population.[3, 6, 17, 20] Our previous work on missing data in The Health Improvement Network (THIN) primary care database showed that many health indicator measurements (for example, weight and blood pressure) recorded within the first year of patients' registration at a general practice were comparable with large external datasets before and after multiple imputation.[16] However, smoking status was not directly comparable with data from the Health Survey for England (HSE). Although the proportion of smokers was similar between THIN and the HSE *before* multiple imputation of data in THIN, the proportion of smokers was substantially higher *after* multiple imputation in THIN. On the other hand, the proportion of ex-smokers was substantially lower in THIN both *before* and *after* imputation compared to the HSE. This suggests that current smokers may be adequately identified using primary care data and most people with missing data on smoking status are likely to be either ex or non-smokers. This has clinical importance as smoking status (including ex-smoking) may be used to

1  
2  
3 identify those at risk of disease, for example chronic obstructive pulmonary  
4  
5 disease or cardiovascular disease.  
6  
7  
8  
9

10 In this study we further investigate recording of smoking status in primary care  
11 and explore potential reasons for the discrepancy in the proportion of ex-smokers  
12 between primary care records and the HSE. Specifically, we seek to deduce  
13 when ex-smokers may not be recorded as such in primary care records based on  
14 information about time since quitting in the HSE. Finally, we aim to provide a  
15 practical solution for imputation of missing smoking status records in routinely  
16 collected clinical data.  
17  
18  
19  
20  
21  
22  
23  
24  
25  
26  
27  
28

## 29 **METHODS**

### 30 **Study populations**

31 We used data from THIN primary care database.[21] In the United Kingdom  
32 (UK) 98% of the population are registered with a National Health Service (NHS)  
33 general practitioner to receive routine healthcare.[22] THIN is broadly  
34 representative of all general practices in the UK in terms of age and sex of  
35 patients, practice size and geographical distribution.[23] The database contains  
36 information on socio demographics, symptoms, diagnoses, referrals to secondary  
37 care, prescribing, results of tests and health status indicators. The data provider  
38 (CSD-MR) obtained overall ethical approval from the South East MREC  
39 (MREC/03/01/073) and this study was further approved by a THIN scientific  
40 review committee.  
41  
42  
43  
44  
45  
46  
47  
48  
49  
50  
51  
52  
53  
54  
55  
56  
57  
58  
59  
60



1  
2  
3  
4  
5  
6 For this study we selected patients aged 16 years or over who registered with a  
7  
8 general practice between 1st January 2008 and 31st December 2009  
9  
10 (N=354,204) and we examined records from the first year after the patient  
11  
12 registered, hence using data up to the end of 2010. Many people have a “new  
13  
14 patient check” soon after registration, where information on demographics, health  
15  
16 indicators and disease status is collected.  
17  
18  
19  
20

21  
22 We compared the distribution of smoking status with that in the HSE from 2008  
23  
24 for those aged 16 years or over (N=15,102). The HSE is a national annual cross  
25  
26 sectional interview based survey of approximately 22,000 people.[24] The  
27  
28 survey includes questions on socio demographics, general health and  
29  
30 information on smoking status. The HSE has nearly complete records of  
31  
32 smoking (99.3%) and we therefore used the data from patients with complete  
33  
34 smoking information.  
35  
36  
37  
38  
39  
40

### 41 **Definition of smoking status**

42  
43 In THIN, smoking status was recorded by self-report. In many general practices  
44  
45 this would be on the basis of a questionnaire submitted at the time of registration,  
46  
47 whereas in other general practices this would be recorded in conjunction with a  
48  
49 clinical consultation with the general practitioner or practice nurse. Patients  
50  
51 would be classed as current non-smoker, or current smokers. In some instance  
52  
53 the non-smokers would be classified as ex-smokers but this was variably defined  
54  
55  
56  
57  
58  
59  
60

1  
2  
3 from one practice to another. In the HSE, smoking status was defined on the  
4 basis of a series of questions (see Appendix 1) and individuals who had ever  
5 smoked (but did not smoke at the time of the interview) would be defined as ex-  
6 smokers, regardless of their age at quitting and length of time since they quit.  
7  
8 The HSE holds information on when ex-smokers quit so that age at the time they  
9 quit can be deduced, whereas this information was not consistently available in  
10 THIN.  
11  
12  
13  
14  
15  
16  
17  
18  
19  
20  
21

### 22 **Statistical analyses**

23  
24 Initially, we examined smoking status (smoker, ex-smoker, non-smoker or  
25 missing) in THIN and the HSE, overall, by age group, gender and Index of  
26 Multiple Deprivation 2004 (IMD) quintile[25]. Then we used multiple imputation  
27 to impute missing smoking status in THIN. Multiple imputation is a statistical  
28 method which uses the data available to model the likely distribution of missing  
29 data.[18] A number of imputed datasets are produced in each of which plausible  
30 values are drawn from the imputation model. The method is designed to  
31 correctly reflect the uncertainty surrounding the missing values. With an  
32 appropriate imputation model, multiple imputation is an unbiased method of  
33 accounting for missing data. It is usually performed under the missing at random  
34 (MAR) assumption, but it may also be performed under specific missing not at  
35 random (MNAR) assumptions. These methods have been described in greater  
36 detail elsewhere.[18, 26-28]  
37  
38  
39  
40  
41  
42  
43  
44  
45  
46  
47  
48  
49  
50  
51  
52  
53  
54  
55  
56  
57  
58  
59  
60

1  
2  
3 After preliminary analysis,[26] we included the following variables in the multiple  
4 imputation models: age in years, gender and IMD quintile,[25] health indicators:  
5 smoking status (three categories, non, ex and current smoker), height, weight,  
6 systolic and diastolic blood pressures and disease indicators: type II diabetes,  
7 coronary heart disease (CHD) and cerebrovascular accident (CVA). Multiple  
8 imputation was performed using Chained Equations using the ice command  
9 using Stata 11.[29, 30] Continuous variables were imputed using multiple linear  
10 regression, smoking status using multinomial regression and IMD quintile using  
11 ordered logistic regression. Percentages in each smoking category were  
12 obtained using Rubin's Rules.[31] In the first multiple imputation we assumed  
13 that smoking data were MAR and hence allowed imputed smoking data of either  
14 smokers, non-smokers or ex-smokers (using a MAR assumption; hereafter  
15 referred to as MAR MI). In the second multiple imputation we assumed that all  
16 smokers had been recorded (so that smoking data were MNAR) and we imputed  
17 missing smoking data as either ex-smokers or non-smokers (hereafter referred to  
18 as MNAR MI).

19  
20  
21  
22  
23  
24  
25  
26  
27  
28  
29  
30  
31  
32  
33  
34  
35  
36  
37  
38  
39  
40  
41  
42  
43 Following multiple imputation we carried out age-specific direct standardisation  
44 using the HSE as the standard population and the age-specific proportion in each  
45 smoking category from THIN. This was done to account for the fact that the  
46 mean age in the HSE was 49 years while the mean age in THIN was 38 years in  
47 the year after registration.  
48  
49  
50  
51  
52  
53  
54  
55  
56  
57  
58  
59  
60

1  
2  
3 We deduced the average time after which an ex-smoker is no longer classified as  
4 an ex-smoker in primary care records by combining information from the HSE on  
5  
6 an ex-smoker in primary care records by combining information from the HSE on  
7  
8 when ex-smokers quit and the age-specific distribution of ex-smokers in THIN  
9  
10 after imputation of non and ex-smokers. This was done by ranking the  
11  
12 individuals in the HSE in accordance to the length of time since they quit by 10  
13  
14 year age groups and then 'reclassifying' individuals who had quit the longest time  
15  
16 ago within each age group from ex to non until we reached the same proportion  
17  
18 of ex-smokers in the HSE as in THIN.  
19  
20  
21  
22  
23

## 24 **RESULTS**

25  
26 In total, 354,204 individuals were included from THIN and 15,102 from the HSE.  
27  
28 Individuals in THIN were, on average 11 years younger than those in the HSE  
29  
30 (38 years versus 49 years, respectively) (Table 1). Smoking status was recorded  
31  
32 for 84% in THIN within one year of initial registration. Before multiple imputation  
33  
34 of missing data, a greater proportion of people were recorded as smokers in  
35  
36 THIN than the HSE (24% versus 21% respectively), and the proportions of ex-  
37  
38 smokers and non-smokers differed substantially between THIN and the HSE  
39  
40  
41 (Table 1).  
42  
43  
44  
45  
46  
47  
48  
49  
50  
51  
52  
53  
54  
55  
56  
57  
58  
59  
60

Table 1: Summary statistics for THIN in the first year of registration and the HSE 2008

| Variable               | THIN    |      | HSE   |      |
|------------------------|---------|------|-------|------|
|                        | n       | %    | n     | %    |
| Male                   | 164,085 | 46   | 6,760 | 45   |
| Female                 | 190,119 | 54   | 8,342 | 55   |
| Missing sex            |         | 0    |       | 0    |
| Non-smoker             | 165,618 | 47   | 7,874 | 52   |
| Ex-smoker              | 49,874  | 14   | 3,966 | 26   |
| Current smoker         | 83,526  | 24   | 3,158 | 21   |
| Missing smoking status | 55,186  | 16   | 104   | 1    |
| Age years mean (SD)    | 38      | (17) | 49    | (19) |
| Missing age            |         | 0    |       | 0    |

Abbreviations: HSE Health Survey for England 2008; THIN The Health Improvement Network.

Our first analyses used missing as a separate category of smoking, so we refer to those with reported smoking status as “known smokers” and “known ex-smokers”. The proportion of known smokers by age group was similar in THIN and the HSE between 30 and 79 years, but this was not the case for the proportions of known ex-smokers and non-smokers (Figure 1). In the HSE, the proportion of known ex-smokers increased from 12% within the 20-29 age group to 46% in the 80-89 age group. In THIN, the proportion of known ex-smokers also increased with age although the overall proportion of known ex-smokers was smaller than in the HSE for all age groups after 20-29 years. Conversely, in the HSE, the proportion of non-smokers decreased slightly from 56% in the 20-29 age group to 48% in the 80-89 age group. Within THIN, the proportion of known non-smokers remained constant with increasing age at around 43%. The proportion of missing smoking data in THIN was relatively constant at less than

1  
2  
3 20% until the 70-79 years age group, but increased substantially thereafter  
4  
5 (Figure 1).  
6  
7  
8  
9

10 (Figure 1 here)  
11  
12  
13

14  
15 In THIN, the percentage of non-smokers was greater for women (52%) than men  
16 (40%) while the percentage of smokers was smaller for women (21%) than men  
17 (27%). There were similar trends in the HSE, although the percentage  
18 differences between sexes were smaller (smokers: 22% of men versus 20% of  
19 women).  
20  
21  
22  
23  
24  
25  
26  
27  
28

29 The proportions in each smoking status category varied substantially by social  
30 deprivation in both THIN and the HSE (Figure 2). In THIN, the percentage of  
31 non-smokers decreased from 52% in the least deprived quintile to 40% in the  
32 most deprived quintile. The percentage of ex-smokers decreased slightly with  
33 increasing deprivation. In contrast, the percentage of smokers increased with  
34 increasing deprivation from 16% in the least deprived quintile to 34% in the most  
35 deprived quintile (Figure 2). The patterns were similar in the HSE although the  
36 proportion of ex-smokers was substantially larger across all levels of deprivation  
37 in the HSE compared to THIN.  
38  
39  
40  
41  
42  
43  
44  
45  
46  
47  
48  
49

50  
51  
52 (Figure 2 here)  
53  
54  
55  
56  
57  
58  
59  
60

### Analyses imputing missing smoking status

After MAR MI of THIN, age-standardised smoking prevalences still differed somewhat between THIN and the HSE. For example, 22% were ex-smokers in THIN compared with 26% in the HSE; 25% were smokers in THIN, compared with 21% in the HSE (Table 2).

After MNAR MI of THIN (that is, regarding missing values as either ex-smokers or non-smokers), the age-standardised prevalence of smoking in THIN was similar to that in the HSE (Table 2). However, the age-specific prevalence of ex-smokers was still greater in HSE than in THIN. Age-specific analysis showed that this difference was greatest at older ages, and indeed reversed at younger ages. This suggested that individuals who had quit in the less recent past might be classified as non-smokers in THIN but as ex-smokers in HSE. (Figure 3).

Table 2: Percentages within each smoking status for THIN and the HSE 2008 after various adjustments

| Category   | THIN          |                            |                             | HSE      |                                       |
|------------|---------------|----------------------------|-----------------------------|----------|---------------------------------------|
|            | Complete case | After MAR MI <sup>ab</sup> | After MNAR MI <sup>ac</sup> | Observed | Reclassifying ex-smokers <sup>d</sup> |
|            | %             | %                          | %                           | %        | %                                     |
| Non-smoker | 55            | 53                         | 57                          | 53       | 57                                    |
| Ex-smoker  | 17            | 22                         | 23                          | 26       | 22                                    |
| Smoker     | 28            | 25                         | 20                          | 21       | 21                                    |

Abbreviations: HSE Health Survey for England 2008; THIN The Health Improvement Network.

<sup>a</sup> Directly standardised using the HSE age distribution as standard.

<sup>b</sup> Imputed assuming that missing values are smokers, non-smokers or ex-smokers

<sup>c</sup> Imputed assuming that missing values are non-smokers or ex-smokers

<sup>d</sup> Within each age group, reclassifying the optimum number of ex-smokers as non-smokers.

(Figure 3 here)

The median time since ex-smokers quit in the HSE varied greatly by age group (Table 3), from two years (Interquartile range (IQR): 0, 3) in the under 20s to 40 (IQR: 25, 51) years in those aged 90 or over (Table 3). Equating proportions of ex-smokers in THIN to that in the HSE data suggested the typical time-window after which patients are no longer regarded as ex-smokers in primary care, but instead regarded as non-smokers, varied with age. Thus, typically individuals who registered with a general practice when they were in their forties would no longer be recorded as an ex-smoker if they quit more than 22 years earlier (when they were between 18 and 27 years of age) (Table 3). Individuals registering in their seventies would typically no longer be recorded as ex-smokers if they quit 42 years earlier (when they were between the ages of 28 and 37 years) (Table 3). Yet, most individuals who quit after the age of 30 would still be captured as ex-smokers when they later registered with a new general practice. Using these age-specific extrapolations to reclassify ex-smokers as non-smokers in the HSE according to when they quit, we can see that the age-specific distributions of ex-smokers in THIN and the reclassified HSE are similar (Figure 3).



Table 3: Age specific centiles of time since quitting smoking in the HSE 2008

| Age group | Median time since quitting (years) | Extrapolated number of years since quitting | Extrapolated age when they quit |
|-----------|------------------------------------|---------------------------------------------|---------------------------------|
| <20       | 2                                  | *                                           | *                               |
| 20-29     | 3                                  | *                                           | *                               |
| 30-39     | 5                                  | 14                                          | 16 - 25                         |
| 40-49     | 10                                 | 22                                          | 18 - 27                         |
| 50-59     | 20                                 | 30                                          | 20 - 29                         |
| 60-69     | 24                                 | 35                                          | 25 - 34                         |
| 70-79     | 30                                 | 42                                          | 28 - 37                         |
| 80-89     | 32                                 | 40                                          | 40 - 49                         |
| 90+       | 40                                 | 46                                          | 44+                             |

\*Not possible to assign an optimal value for reclassification to these age groups  
Abbreviations: HSE Health Survey for England 2008

## DISCUSSION

The proportion of newly registered patients in THIN between 2008 and 2009 with a record of being a smoker was slightly higher than the HSE in 2008. However, the proportion of individuals recorded as ex-smokers and non-smokers differed substantially between THIN and the HSE. Overall, a larger proportion of individuals were recorded as ex-smokers in the HSE than in THIN and this increased with age. Likewise, the proportion of ex-smokers was substantially larger across all levels of deprivation in the HSE compared to THIN.

Under MAR MI there was a greater percentage of smokers (25%) and a smaller percentage of ex-smokers (22%) in THIN compared with the HSE (smokers 21%, ex-smokers 26%). However, under MNAR MI (assuming all missing data were either ex-smokers or non-smokers) slightly increased the proportion of non-smokers (57%) in THIN compared to the HSE (53%), whereas the proportion of ex-smokers (23%) was slightly lower in THIN. Moreover, the latter imputation

1  
2  
3 resulted in a relatively larger percentage of ex-smokers in THIN in those aged  
4 under 30 years compared with the HSE. This may be because the imputation  
5 model was unable to distinguish between ex and non-smokers in those age  
6 groups as both are unlikely to have developed typical later onset diseases which  
7 are key predictors of smoking status in the imputation model.  
8  
9  
10  
11  
12  
13

14  
15  
16  
17 There may be several reasons for the discrepancy in the distribution of the  
18 smoking categories between THIN and the HSE. In the HSE, the definition of an  
19 ex-smoker was highly sensitive and clearly defined.[24] Thus respondents were  
20 categorised as ex-smokers even if they were a trivial smoker, smoked for a short  
21 period of time and/ or quit many decades ago. Also, the HSE used computer  
22 aided personal interviewing; where questions were read to the respondent in a  
23 standardised way from the screen and a detailed sequence of questions were  
24 asked to ascertain current smoking status. In primary care, while smoking status  
25 is systematically recorded in medical records, there is no detailed protocol for  
26 recording smoking status and the ascertainment is thus likely to vary by how the  
27 information was obtained. Many practices use self-report questionnaires at  
28 registration including smoking status. Smoking status is then updated by health  
29 professionals (general practitioners and/ or practice nurses) during consultations  
30 where smoking status is often recorded as part of an assessment of current or  
31 future disease risk.  
32  
33  
34  
35  
36  
37  
38  
39  
40  
41  
42  
43  
44  
45  
46  
47  
48  
49  
50  
51  
52  
53  
54  
55  
56  
57  
58  
59  
60

1  
2  
3 Our examination of the age-standardised data suggests that typically an ex-  
4 smoker in primary care settings is recorded as a non-smoker when they quit at a  
5 young age or had not smoked for a substantial time period. This could be  
6 because the patient may not volunteer previous smoking in either initial self-  
7 report questionnaire or on questioning by clinicians when it was minor, long ago  
8 or they consider it not relevant to their current or future health. It is possible that  
9 patients are more reluctant to volunteer ex-smoking habits when data are being  
10 held on their medical record and is not anonymous. However, comparing the  
11 proportion of individuals with a smoking record in THIN with that of the HSE we  
12 found a similar distribution suggesting that most smokers were identified in the  
13 first year of their registration in primary care. Similar findings have been  
14 observed in the literature by calendar year.[32] While some studies suggest  
15 underreporting of smoking among pregnant women in primary care[33] we found  
16 no evidence this was a general pattern. With the introduction of the Quality and  
17 Outcomes Framework in 2004, there has also been increased incentive to  
18 identify smokers in relation to specific disease outcomes.[34, 35] Indeed we  
19 found in our previous study that those with respiratory and cardiac conditions  
20 were more likely to have any smoking status recorded within the first year of  
21 registration.[13] Smoking status was validated in the HSE in 2007 by the use of  
22 saliva cotinine samples and was found to be accurate[36].  
23  
24  
25  
26  
27  
28  
29  
30  
31  
32  
33  
34  
35  
36  
37  
38  
39  
40  
41  
42  
43  
44  
45  
46  
47  
48  
49  
50  
51  
52

53 The method of age standardisation then deducing the average time since quitting  
54 and reclassifying them to non-smokers in the HSE is relatively crude and  
55  
56  
57  
58  
59  
60

1  
2  
3 assumes that everyone who becomes an ex-smoker does so at the same time in  
4  
5 their lives as others in their age group. However, it may be indicative of reporting  
6  
7 of smoking status at the GP practice, given the results shown in this study.  
8  
9

10  
11  
12 An alternative method of dealing with unobserved smoking data is to dichotomise  
13  
14 smoking status into current smokers and non-current smokers with missing data  
15  
16 assumed to be non-current smokers. However, it should be noted that this  
17  
18 solution may be to the detriment of some epidemiological studies where ex-  
19  
20 smokers who quit recently are at greater risk of disease than non-smokers. For  
21  
22 example, the 50 year follow up of male British doctors shows that ex-smokers  
23  
24 had elevated age standardised mortality rates for many diseases.[37, 38]  
25  
26  
27  
28  
29  
30

31  
32 Our findings suggest that *in contrast* to health surveys, patients who quit smoking  
33  
34 at a young age (before 25-30) are likely to be recorded by their general practice  
35  
36 as a non-smoker instead of an ex-smoker. This has implications for researchers  
37  
38 using these data sources. To our knowledge this is the first study which seeks to  
39  
40 deduce and quantify typical time between when a smoker quit and when they are  
41  
42 no longer perceived as an ex-smoker in primary care. Clinicians, policy-makers  
43  
44 and researchers who wish to use smoking status in primary care records to  
45  
46 identify populations at risk of smoking-related diseases can be reassured by our  
47  
48 findings that using data from new registrations, most current smokers will be  
49  
50 identified and misclassification of ex-smokers is more likely to have occurred in  
51  
52 those who have quit smoking at an early age and/ or a long time ago.  
53  
54  
55  
56  
57  
58  
59  
60

1  
2  
3 Figure Legends  
4  
5

6 Figure 1: Smoking status percentages in THIN and the HSE 2008 by age group  
7

8 Figure 1 footnotes:

9 Solid line is the Health Survey for England 2008, dashed line is The Health  
10 Improvement Network (THIN)  
11  
12

13  
14 Figure 2: Smoking status percentages in THIN and the HSE 2008 by deprivation  
15 quintile  
16

17 Figure 2 footnotes:

18 \*IMD 1 is the least deprived and IMD 5 is the most deprived

19 Darker bars represent the HSE 2008, lighter bars represent THIN

20 Abbreviations: HSE Health Survey for England 2008, IMD Index of multiple  
21 deprivation, THIN The Health Improvement Network  
22  
23

24  
25  
26 Figure 3: Age group specific percentages of ex-smokers in THIN (after MNAR  
27 imputation) and the HSE 2008 (before and after reclassifying ex-smokers in the  
28 HSE who quit before the age specified in Table 3 column 3 to be non-smokers)  
29

30 Figure 3 footnotes:

31 Abbreviations: THIN The Health Improvement Network, HSE Health Survey for  
32 England 2008  
33  
34  
35  
36  
37  
38  
39  
40  
41  
42  
43  
44  
45  
46  
47  
48  
49  
50  
51  
52  
53  
54  
55  
56  
57  
58  
59  
60

### **Conflict of interest and funding**

The authors have no conflicts of interest to declare. This study is funded by a UK Medical Research Council grant [G0900701]. The funder had no influence over the study design, results or decision to publish this work. JRC was funded by a UK Economic and Social Research Council research fellowship grant [RES-063-27-0257]. IRW was funded by a United Kingdom Medical Research Council grant [U105260558].

### **Author contributions**

LM extracted and analysed the data and wrote the first draft of the paper with help from IP and JRC. KRW and IN provided clinical input and IRW and RWM provided additional statistical input. All authors commented on the paper and helped write subsequent drafts.

### **Data sharing statement**

No data are available

I Dr Louise Marston the Corresponding Author of this article contained within the original manuscript which includes any diagrams & photographs, other illustrative material, video, film or any other material howsoever submitted by the Contributor(s) at any time and related to the Contribution (“the Contribution”) have the right to grant on behalf of all authors and do grant on behalf of all authors, a licence to the BMJ Publishing Group Ltd and its licensees, to permit this Contribution (if accepted) to be published in BMJ Open and any other BMJ Group products and to exploit all subsidiary rights, as set out in the licence at: [http://group.bmj.com/products/journals/instructions-for-authors/BMJOpen\\_licence.pdf](http://group.bmj.com/products/journals/instructions-for-authors/BMJOpen_licence.pdf)

1  
2  
3  
4  
5  
6  
7  
8  
9  
10  
11  
12  
13  
14  
15  
16  
17  
18  
19  
20  
21  
22  
23  
24  
25  
26  
27  
28  
29  
30  
31  
32  
33  
34  
35  
36  
37  
38  
39  
40  
41  
42  
43  
44  
45  
46  
47  
48  
49  
50  
51  
52  
53  
54  
55  
56  
57  
58  
59  
60

## References

1 Office for National Statistics Opinions and Lifestyle Survey, Smoking Habits  
Amongst Adults, 2012; 2013 ([http://www.ons.gov.uk/ons/dcp171776\\_328041.pdf](http://www.ons.gov.uk/ons/dcp171776_328041.pdf))  
(accessed January 2014)

2 Davies AR, Smeeth L, Grundy EMD. Contribution of changes in incidence and  
mortality to trends in the prevalence of coronary heart disease in the UK: 1996-  
2005. *Eur Heart J* 2007;2142-2147.

3 Delaney JAC, Daskalopoulou SS, Brophy JM et al Lifestyle variables and the  
risk of myocardial infarction in the general practice research database (electronic  
article). *BMC Cardiovasc Disord* 2007;38.

4 Douglas IJ, Smeeth L. Exposure to antipsychotics and risk of stroke: self  
controlled case series study (electronic article). *Br Med J* 2008;

5 Gelfand JM, Neimann AL, Shin DB et al Risk of myocardial infarction in  
patients with psoriasis. *JAMA* 2006;1735-1741.

6 Hippisley-Cox J, Coupland C, Vinogradova Y et al Derivation and validation of  
QRISK, a new cardiovascular disease risk score for the United Kingdom:  
prospective open cohort study. *Br Med J* 2007;136-141.

1  
2  
3 7 Osborn DPJ, Levy G, Nazareth I et al Relative risk of cardiovascular and  
4 cancer mortality in people with severe mental illness from the United Kingdom's  
5 General Practice Research Database. *Arch Gen Psychiatry* 2007;242-249.  
6  
7  
8  
9

10  
11  
12 8 Smeeth L, Thomas SL, Hall AJ et al Risk of myocardial infarction and stroke  
13 after acute infection or vaccination. *N Engl J Med* 2004;2611-2618.  
14  
15  
16  
17

18  
19  
20 9 Walters K, Rait G, Petersen I et al Panic disorder and risk of new onset  
21 coronary heart disease, acute myocardial infarction, and cardiac mortality: cohort  
22 study using the general practice research database. *Eur Heart J* 2008;2981-  
23 2988.  
24  
25  
26  
27

28  
29  
30  
31 10 Horsfall LJ, Rait G, Walters K et al Serum Bilirubin and Risk of Respiratory  
32 Disease and Death *JAMA* 2011;691-697  
33  
34  
35  
36

37  
38  
39 11 Kiri VA, Fabbri LM, Davis KJ et al Inhaled corticosteroids and risk of lung  
40 cancer among COPD patients who quit smoking *Respir Med* 2009;85-90  
41  
42  
43  
44

45  
46 12 Horsfall LJ, Nazareth I, Petersen I. Cardiovascular Events as a Function of  
47 Serum Bilirubin Levels in a Large Statin-Treated Cohort. *Circulation* 2012;2556-  
48 2564  
49  
50  
51  
52



1  
2  
3 13 Szatkowski L, Lewis S, McNeill A et al Is smoking status routinely recorded  
4 when patients register with a new GP? *Fam Pract* 2010;673–675  
5  
6  
7

8  
9  
10 14 Dhalwani NN, Tata LJ, Coleman T, Fleming KM, Szatkowski L Completeness  
11 of Maternal Smoking Status Recording during Pregnancy in United Kingdom  
12 Primary Care Data. *PLoS One* 2013;e72218  
13  
14  
15  
16

17  
18  
19 15 Coleman T, Lewis S, Hubbard R et al Impact of contractual financial  
20 incentives on the ascertainment and management of smoking in primary care.  
21 *Addiction* 2007;102:803e8.  
22  
23  
24  
25  
26

27  
28  
29 16 Marston L, Carpenter JR, Walters KR et al Issues in multiple imputation of  
30 missing data for large general practice clinical databases *Pharmacoepidemiol*  
31 *Drug Saf* 2010;618–626  
32  
33  
34  
35  
36

37  
38  
39 17 Weiner MG, Barnhart K, Xie D et al Hormone therapy and coronary heart  
40 disease in young women. *Menopause* 2008;86-93.  
41  
42  
43  
44

45  
46 18 Sterne JAC, White IR, Carlin JB et al. Multiple imputation for missing data in  
47 epidemiological and clinical research: potential and pitfalls. *Br Med J* 2009;b2393  
48  
49  
50  
51  
52  
53  
54  
55  
56  
57  
58  
59  
60

1  
2  
3 19 Hippisley-Cox J, Coupland C, Vinogradova Y et al Predicting cardiovascular  
4 risk in England and Wales: prospective derivation and validation of QRISK2. *Br*  
5  
6 *Med J* 2008;1475-1482  
7  
8  
9

10  
11  
12 20 Collins GS, Altman DG An independent and external validation of QRISK2  
13 cardiovascular disease risk score: a prospective open cohort study *Br Med J*  
14  
15 2010;c2442  
16  
17  
18  
19

20  
21 21 The Health Improvement Network The Health Improvement Network. London:  
22 The Health Improvement Network; 2014 (<http://csdmruk.cegedim.com/>)  
23  
24 (Accessed January 2014).  
25  
26  
27  
28  
29

30  
31 22 Lis Y, Mann RD The VAMP Research multi-purpose database in the U.K. *J*  
32  
33 *Clin Epidemiol* 1995;431-443.  
34  
35  
36  
37

38 23 Blak BT, Thompson M, Dattani H, Bourke A Generalisability of The Health  
39 Improvement Network (THIN) database: demographics, chronic disease  
40 prevalence and mortality rates. *Inform Prim Care* 2011;251-255.  
41  
42  
43  
44  
45

46  
47 24 National Centre for Social Research and University College London.  
48 Department of Epidemiology and Public Health, *Health Survey for England, 2008*  
49 [computer file]. *2nd Edition*. Colchester, Essex: UK Data Archive [distributor],  
50  
51 October 2010. SN: 6397  
52  
53  
54  
55  
56  
57  
58  
59  
60

1  
2  
3  
4  
5  
6 25 Noble M, Wright G, Dibben C et al Indices of Deprivation 2004. Report to the  
7  
8 Office of the Deputy Prime Minister. London: Neighbourhood Renewal Unit; 2004  
9  
10 (<http://webarchive.nationalarchives.gov.uk/20120919132719/http://www.communi>  
11  
12 [ties.gov.uk/documents/communities/pdf/131209.pdf](http://www.communities.gov.uk/documents/communities/pdf/131209.pdf)) (Accessed January 2014)  
13  
14

15  
16  
17 26 Spratt M, Carpenter J, Sterne JAC et al Strategies for Multiple Imputation in  
18  
19 Longitudinal Studies *Am. J. Epidemiol.* 2010;478-487  
20  
21

22  
23  
24 27 White IR, Royston P, Wood A Multiple imputation using chained equations:  
25  
26 issues and guidance for practice (tutorial). *Stat Med* 2011;377-399  
27  
28

29  
30  
31 28 Graham JW Missing data analysis: Making it work in the real world *Annu Rev*  
32  
33 *Psychol* 2009;549-576  
34  
35

36  
37  
38 29 Stata Corporation. *Stata Statistical Software: Release 11*. College Station, TX:  
39  
40 Stata Corporation; 2009  
41  
42

43  
44  
45 30 Royston P Multiple imputation of missing values: Update of ice. *Stata Journal*  
46  
47 2005;527-536.  
48  
49

50  
51  
52 31 Rubin DB *Multiple imputation for non-response in surveys*. New York: John  
53  
54 Wiley and Sons; 1987  
55  
56  
57  
58  
59  
60

1  
2  
3  
4  
5  
6 32 Szatkowski L, Lewis S, McNeill A et al Can data from primary care medical  
7 records be used to monitor national smoking prevalence? *J Epidemiol*  
8 *Community Health* 2011. doi:10.1136/jech.2010.120154  
9  
10  
11  
12  
13

14  
15 33 Shipton D, Tappin DM, Vadiveloo T et al Reliability of self reported smoking  
16 status by pregnant women for estimating smoking prevalence: a retrospective,  
17 cross sectional study *Br Med J* 2009;b4347.  
18  
19  
20  
21  
22  
23

24 34 The British Medical Association and NHS Employers Quality and Outcomes  
25 Framework guidance for GMS contract 2011/12; 2011  
26 ([http://www.nhsemployers.org/Aboutus/Publications/Documents/QOF\\_guidance\\_](http://www.nhsemployers.org/Aboutus/Publications/Documents/QOF_guidance_GMS_contract_2011_12.pdf)  
27 [GMS\\_contract\\_2011\\_12.pdf](http://www.nhsemployers.org/Aboutus/Publications/Documents/QOF_guidance_GMS_contract_2011_12.pdf)) (Accessed January 2014)  
28  
29  
30  
31  
32  
33

34  
35  
36 35 Campbell S, Reeves D, Kontopantelis E et al Quality of Primary Care in  
37 England with the Introduction of Pay for Performance *N Engl J Med* 2007;181-  
38 190  
39  
40  
41  
42  
43  
44

45 36 Wardle H, Mindell J Adult cigarette smoking. In Craig R, Shelton N (Ed.),  
46 Health Survey for England 2007. Volume 1. Healthy lifestyles: Knowledge,  
47 attitudes and behaviour. 2008;149-176 NHS Information Centre.  
48  
49  
50  
51  
52  
53  
54  
55  
56  
57  
58  
59  
60

1  
2  
3 37 Doll R, Peto R, Boreham J et al Mortality in relation to smoking: 50 years'  
4 observations on male British doctors *Br Med J* 2004,  
5  
6 doi:10.1136/bmj.38142.554479.AE  
7  
8  
9

10  
11  
12 38 Kenfield SA, Wei EK, Rosner BA et al Burden of smoking on cause-specific  
13 mortality: application to the Nurses' Health Study *Tob Control* 2010;248-254  
14  
15  
16  
17  
18  
19  
20  
21  
22  
23  
24  
25  
26  
27  
28  
29  
30  
31  
32  
33  
34  
35  
36  
37  
38  
39  
40  
41  
42  
43  
44  
45  
46  
47  
48  
49  
50  
51  
52  
53  
54  
55  
56  
57  
58  
59  
60

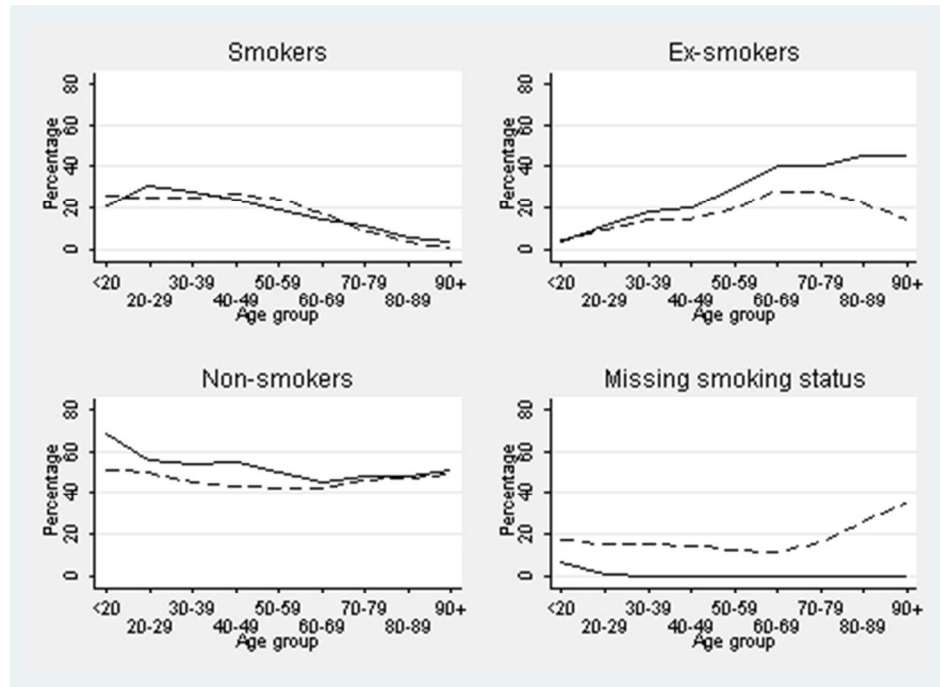

Figure 1: Smoking status percentages in THIN and the HSE 2008 by age group

Solid line is the Health Survey for England 2008, dashed line is The Health Improvement Network (THIN)

166x120mm (72 x 72 DPI)

View only

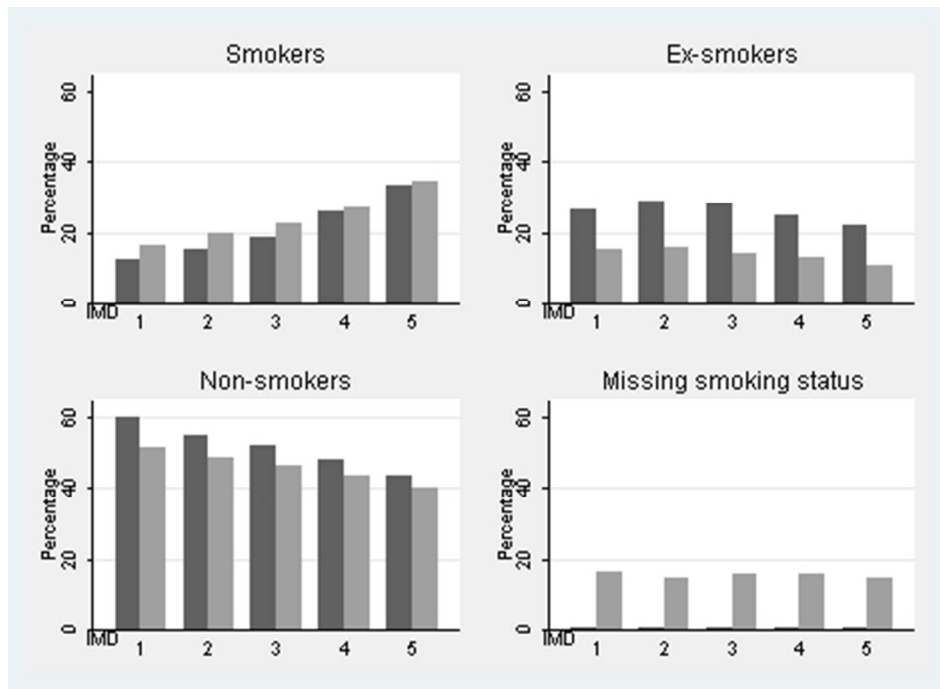

Figure 2: Smoking status percentages in THIN and the HSE 2008 by deprivation quintile

\*IMD 1 is the least deprived and IMD 5 is the most deprived

Darker bars represent the HSE 2008, lighter bars represent THIN

Abbreviations: HSE Health Survey for England 2008, IMD Index of multiple deprivation, THIN The Health Improvement Network

166x120mm (72 x 72 DPI)

View Only

1  
2  
3  
4  
5  
6  
7  
8  
9  
10  
11  
12  
13  
14  
15  
16  
17  
18  
19  
20  
21  
22  
23  
24  
25  
26  
27  
28  
29  
30  
31  
32  
33  
34  
35  
36  
37  
38  
39  
40  
41  
42  
43  
44  
45  
46  
47  
48  
49  
50  
51  
52  
53  
54  
55  
56  
57  
58  
59  
60

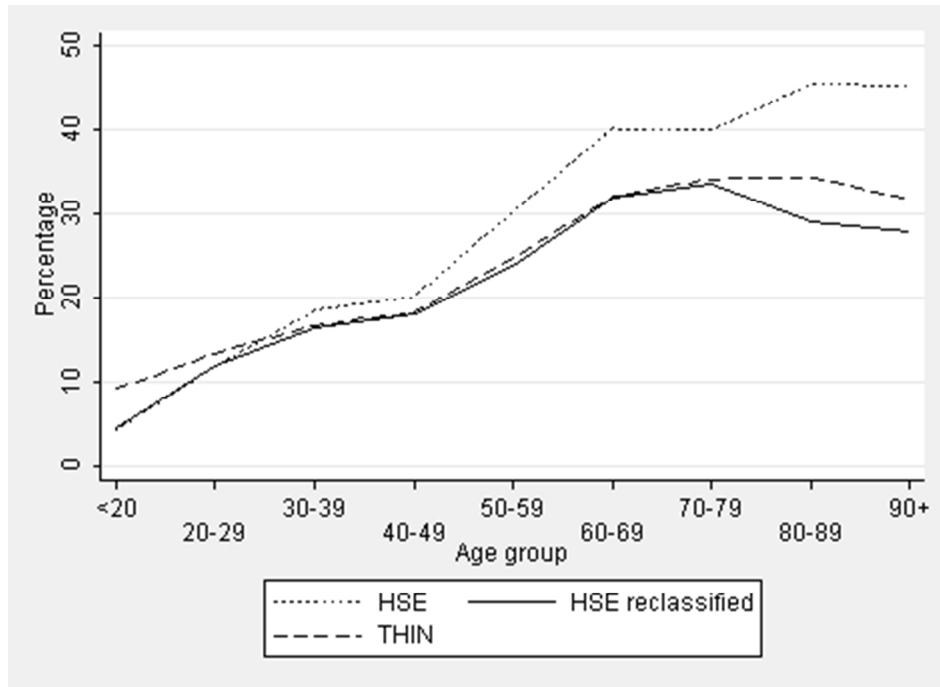

Figure 3: Age group specific percentages of ex-smokers in THIN (after MNAR imputation) and the HSE 2008 (before and after reclassifying ex-smokers in the HSE who quit before the age specified in Table 3 column 3 to be non-smokers)

Abbreviations: THIN The Health Improvement Network, HSE Health Survey for England 2008

166x120mm (72 x 72 DPI)

Review only



STROBE 2007 (v4) Statement—Checklist of items that should be included in reports of *cross-sectional studies*

| Section/Topic                | Item # | Recommendation                                                                                                                                                                       | Reported on page # |
|------------------------------|--------|--------------------------------------------------------------------------------------------------------------------------------------------------------------------------------------|--------------------|
| Title and abstract           | 1      | (a) Indicate the study's design with a commonly used term in the title or the abstract                                                                                               | 1                  |
|                              |        | (b) Provide in the abstract an informative and balanced summary of what was done and what was found                                                                                  | 3-4                |
| <b>Introduction</b>          |        |                                                                                                                                                                                      |                    |
| Background/rationale         | 2      | Explain the scientific background and rationale for the investigation being reported                                                                                                 | 5-7                |
| Objectives                   | 3      | State specific objectives, including any prespecified hypotheses                                                                                                                     | 7                  |
| <b>Methods</b>               |        |                                                                                                                                                                                      |                    |
| Study design                 | 4      | Present key elements of study design early in the paper                                                                                                                              | 7-8                |
| Setting                      | 5      | Describe the setting, locations, and relevant dates, including periods of recruitment, exposure, follow-up, and data collection                                                      | 7-8                |
| Participants                 | 6      | (a) Give the eligibility criteria, and the sources and methods of selection of participants                                                                                          | 8                  |
| Variables                    | 7      | Clearly define all outcomes, exposures, predictors, potential confounders, and effect modifiers. Give diagnostic criteria, if applicable                                             | 8-10               |
| Data sources/<br>measurement | 8*     | For each variable of interest, give sources of data and details of methods of assessment (measurement). Describe comparability of assessment methods if there is more than one group | 8-10               |
| Bias                         | 9      | Describe any efforts to address potential sources of bias                                                                                                                            | 8                  |
| Study size                   | 10     | Explain how the study size was arrived at                                                                                                                                            | NA                 |
| Quantitative variables       | 11     | Explain how quantitative variables were handled in the analyses. If applicable, describe which groupings were chosen and why                                                         | 9-10               |
| Statistical methods          | 12     | (a) Describe all statistical methods, including those used to control for confounding                                                                                                | 9-11               |
|                              |        | (b) Describe any methods used to examine subgroups and interactions                                                                                                                  | 9-11               |
|                              |        | (c) Explain how missing data were addressed                                                                                                                                          | 9-11               |
|                              |        | (d) If applicable, describe analytical methods taking account of sampling strategy                                                                                                   | NA                 |
|                              |        | (e) Describe any sensitivity analyses                                                                                                                                                | NA                 |
| <b>Results</b>               |        |                                                                                                                                                                                      |                    |

|                          |     |                                                                                                                                                                                                              |       |
|--------------------------|-----|--------------------------------------------------------------------------------------------------------------------------------------------------------------------------------------------------------------|-------|
| Participants             | 13* | (a) Report numbers of individuals at each stage of study—eg numbers potentially eligible, examined for eligibility, confirmed eligible, included in the study, completing follow-up, and analysed            | 11    |
|                          |     | (b) Give reasons for non-participation at each stage                                                                                                                                                         | NA    |
|                          |     | (c) Consider use of a flow diagram                                                                                                                                                                           | NA    |
| Descriptive data         | 14* | (a) Give characteristics of study participants (eg demographic, clinical, social) and information on exposures and potential confounders                                                                     | 11-12 |
|                          |     | (b) Indicate number of participants with missing data for each variable of interest                                                                                                                          | 12    |
| Outcome data             | 15* | Report numbers of outcome events or summary measures                                                                                                                                                         | 12    |
| Main results             | 16  | (a) Give unadjusted estimates and, if applicable, confounder-adjusted estimates and their precision (eg, 95% confidence interval). Make clear which confounders were adjusted for and why they were included | 12-16 |
|                          |     | (b) Report category boundaries when continuous variables were categorized                                                                                                                                    | NA    |
|                          |     | (c) If relevant, consider translating estimates of relative risk into absolute risk for a meaningful time period                                                                                             | NA    |
| Other analyses           | 17  | Report other analyses done—eg analyses of subgroups and interactions, and sensitivity analyses                                                                                                               | NA    |
| <b>Discussion</b>        |     |                                                                                                                                                                                                              |       |
| Key results              | 18  | Summarise key results with reference to study objectives                                                                                                                                                     | 16    |
| Limitations              | 19  | Discuss limitations of the study, taking into account sources of potential bias or imprecision. Discuss both direction and magnitude of any potential bias                                                   | 17-19 |
| Interpretation           | 20  | Give a cautious overall interpretation of results considering objectives, limitations, multiplicity of analyses, results from similar studies, and other relevant evidence                                   | 17-18 |
| Generalisability         | 21  | Discuss the generalisability (external validity) of the study results                                                                                                                                        | 19    |
| <b>Other information</b> |     |                                                                                                                                                                                                              |       |
| Funding                  | 22  | Give the source of funding and the role of the funders for the present study and, if applicable, for the original study on which the present article is based                                                | 21    |

\*Give information separately for cases and controls in case-control studies and, if applicable, for exposed and unexposed groups in cohort and cross-sectional studies.

**Note:** An Explanation and Elaboration article discusses each checklist item and gives methodological background and published examples of transparent reporting. The STROBE checklist is best used in conjunction with this article (freely available on the Web sites of PLoS Medicine at <http://www.plosmedicine.org/>, Annals of Internal Medicine at <http://www.annals.org/>, and Epidemiology at <http://www.epidem.com/>). Information on the STROBE Initiative is available at [www.strobe-statement.org](http://www.strobe-statement.org).

# BMJ Open

## Smoker, ex-smoker or non-smoker? The validity of routinely recorded smoking status in UK primary care: a cross-sectional study

|                                 |                                                                                                                                                                                                                                                                                                                                                                                                                                                                                                                                                                                                   |
|---------------------------------|---------------------------------------------------------------------------------------------------------------------------------------------------------------------------------------------------------------------------------------------------------------------------------------------------------------------------------------------------------------------------------------------------------------------------------------------------------------------------------------------------------------------------------------------------------------------------------------------------|
| Journal:                        | <i>BMJ Open</i>                                                                                                                                                                                                                                                                                                                                                                                                                                                                                                                                                                                   |
| Manuscript ID:                  | bmjopen-2014-004958.R1                                                                                                                                                                                                                                                                                                                                                                                                                                                                                                                                                                            |
| Article Type:                   | Research                                                                                                                                                                                                                                                                                                                                                                                                                                                                                                                                                                                          |
| Date Submitted by the Author:   | 20-Mar-2014                                                                                                                                                                                                                                                                                                                                                                                                                                                                                                                                                                                       |
| Complete List of Authors:       | Marston, Louise; University College London, Primary Care and Population Health<br>Carpenter, James; London School of Hygiene & Tropical Medicine, Medical Statistics; MRC Clinical Trials Unit,<br>Walters, Kate; University College London, Primary Care and Population Health<br>Morris, Richard; University College London, Primary Care and Population Health<br>Nazareth, Irwin; University College London, Primary Care and Population Health<br>White, Ian; Medical Research Council, Biostatistics Unit<br>Petersen, Irene; University College London, Primary Care and Population Health |
| <b>Primary Subject Heading</b>: | General practice / Family practice                                                                                                                                                                                                                                                                                                                                                                                                                                                                                                                                                                |
| Secondary Subject Heading:      | Smoking and tobacco, Research methods                                                                                                                                                                                                                                                                                                                                                                                                                                                                                                                                                             |
| Keywords:                       | PRIMARY CARE, STATISTICS & RESEARCH METHODS, EPIDEMIOLOGY                                                                                                                                                                                                                                                                                                                                                                                                                                                                                                                                         |
|                                 |                                                                                                                                                                                                                                                                                                                                                                                                                                                                                                                                                                                                   |

SCHOLARONE™  
Manuscripts

1  
2  
3 **Title: Smoker, ex-smoker or non-smoker? The validity of routinely**  
4 **recorded smoking status in UK primary care: a cross-sectional study**  
5  
6  
7  
8  
9

10 **Authors**

11 Louise Marston<sup>1</sup>

12 James R Carpenter<sup>2, 3</sup>

13 Kate R Walters<sup>1</sup>

14 Richard W Morris<sup>1</sup>

15 Irwin Nazareth<sup>1</sup>,

16 Ian R White<sup>4</sup>

17 Irene Petersen<sup>1</sup>

18  
19  
20  
21  
22  
23  
24  
25  
26  
27  
28  
29  
30  
31  
32 <sup>1</sup>Department of Primary Care and Population Health, University College London,  
33 Rowland Hill Street, London, NW3 2PF, United Kingdom

34  
35  
36 <sup>2</sup>Department of Medical Statistics, London School of Hygiene and Tropical  
37 Medicine, Keppel Street, London, WC1E 7HT, United Kingdom

38  
39  
40  
41 <sup>3</sup> MRC Clinical Trials Unit, Kingsway, London

42  
43  
44 <sup>4</sup>MRC Biostatistics Unit, Cambridge Institute of Public Health, University Forvie  
45 Site, Robinson Way, Cambridge, CB2 0SR, United Kingdom  
46  
47  
48

49  
50 Please address correspondence to:

51 Dr Louise Marston

52  
53  
54  
55 Department of Primary Care and Population Health  
56  
57  
58  
59  
60

1  
2  
3 University College London  
4

5 Rowland Hill Street  
6

7 London  
8

9  
10 NW3 2PF  
11

12 United Kingdom  
13

14  
15  
16  
17  
18 l.marston@ucl.ac.uk  
19

20 Telephone: +44 20 7794 0500 (36768)  
21

22 Fax: +44 20 7794 1224  
23

24  
25  
26 Words: 3,376  
27  
28  
29  
30  
31  
32  
33  
34  
35  
36  
37  
38  
39  
40  
41  
42  
43  
44  
45  
46  
47  
48  
49  
50  
51  
52  
53  
54  
55  
56  
57  
58  
59  
60

**ABSTRACT**

**Objectives:** To investigate how smoking status is recorded in UK primary care; to evaluate whether appropriate multiple imputation (MI) of smoking status yields results consistent with health surveys.

**Setting:** UK primary care and a population survey conducted in the community.

**Participants:** We identified 354,204 patients aged 16 or over in The Health Improvement Network (THIN) primary care database registered with their general practice 2008-2009 and 15,102 individuals aged 16 or over in the Health Survey for England (HSE).

**Outcome measures:** Age-standardised and age-specific proportions of smokers, ex-smokers and non-smokers in THIN and the HSE before and after multiple imputation (MI). Using information on time since quitting in the HSE, we estimated when ex-smokers are typically recorded as non-smokers in primary care records.

**Results:** In THIN, smoking status was recorded for 84% of patients within one year of registration. Of these; 28% were smokers (21% in the HSE). After MI of missing smoking data, the proportion of smokers was 25% (missing at random) and 20% (missing not at random). With increasing age, more were identified as ex-smokers in the HSE than THIN. It appears that those who quit before age 30

1  
2  
3 were less likely to be recorded as an ex-smoker in primary care than people who  
4  
5 quit later.  
6  
7  
8  
9

10 **Conclusions:** Smoking status was relatively well recorded in primary care.  
11  
12 Misclassification of ex-smokers as non-smokers is likely to occur in those quitting  
13  
14 smoking at an early age and/ or a long time ago. Those with no smoking status  
15  
16 information are more likely to be ex or non-smokers than smokers.  
17  
18  
19

## 20 21 22 **STRENGTHS AND LIMITATIONS OF THIS STUDY** 23

- 24 • This study includes data from 'real' life primary care electronic records
- 25
- 26 • First study to compare the definition of smoking status in primary care with
- 27
- 28 a population survey
- 29
- 30
- 31 • Study focuses on data recorded in the first year after patient registration
- 32
- 33 and may not be applicable to other times.
- 34
- 35
- 36
- 37
- 38

39 **KEYWORDS:** recording of smoking, primary care databases, Health Survey for  
40  
41 England, missing data, multiple imputation  
42  
43  
44  
45  
46  
47  
48  
49  
50  
51  
52  
53  
54  
55  
56  
57  
58  
59  
60

## INTRODUCTION

A fifth of the British adult population are smokers [1] and there is still a need for further research into smoking and smoking related diseases including coronary heart disease and stroke, respiratory diseases and cancers. Routinely collected smoking data can be used in clinical practice to identify populations at risk of smoking-related diseases, such as identifying smokers to undergo spirometry testing for early diagnosis of Chronic Obstructive Pulmonary Disease (COPD), or to be invited for smoking cessation services. It is important to understand the accuracy of the data, and whether cases may be missed in those with no recorded smoking status. Electronic health records, including primary care databases, have proved to be very powerful resources for epidemiological and health research.[2-12], allowing research that would be difficult using primary research methods; for example, studying the elderly and people with severe mental illness.[4, 7, 9, 11] Additionally they include millions of patients giving power to study rare conditions. Nevertheless, as they are collected for clinical reasons, they raise a number of issues when used for research; not least of these is missing data.

In order to conduct such research, it is important to understand how smoking status is recorded in primary care and how missing data may be addressed. There is evidence that the recording of smoking status has improved substantially in UK primary care[13, 14] and estimates of *current smoking* are similar to large population surveys.[15, 16] Most general practices now routinely



1  
2  
3 record smoking status at regular intervals as a part of the Quality Outcome  
4 Framework.[17] However, we do not know how the different and non-  
5  
6  
7  
8  
9  
10  
11  
12  
13  
14  
15  
16  
17  
18  
19  
20  
21  
22  
23  
24  
25  
26  
27  
28  
29  
30  
31  
32  
33  
34  
35  
36  
37  
38  
39  
40  
41  
42  
43  
44  
45  
46  
47  
48  
49  
50  
51  
52  
53  
54  
55  
56  
57  
58  
59  
60

record smoking status at regular intervals as a part of the Quality Outcome Framework.[17] However, we do not know how the different and non-standardised classifications of *ex and, non smokers* in primary care records compared to the standardised recording of smoking status in population surveys such as the Health Survey for England (HSE).

As noted already, a proportion of patients still lack a smoking status record in their primary care records. It is unclear how to deal with these patients when conducting research where smoking status is either the outcome of the research or an explanatory factor for patients' health.[3, 6, 18, 19] Methodological research has demonstrated that including only patients with complete records can substantially bias the results, especially when the reason for missing data is associated with patient outcomes.[20, 21] In recent years, efforts have been made to address missing data in primary care databases[3, 19, 22] using multiple imputation, though reporting on the comparability of the results of multiple imputation with population data has been sparse. Therefore, it is unclear whether multiple imputation accurately replicates data representing the population.[3, 6, 19, 23] Our previous work on missing data in The Health Improvement Network (THIN) primary care database showed that many health indicator measurements (for example, weight and blood pressure) recorded within the first year of patients' registration at a general practice were comparable with large external datasets before and after multiple imputation.[18] However, smoking status was not directly comparable with data from the Health Survey for

1  
2  
3 England (HSE). Although the proportion of smokers was similar between THIN  
4 and the HSE *before* multiple imputation of data in THIN, the proportion of  
5 smokers was substantially higher *after* multiple imputation in THIN. On the other  
6 hand, the proportion of ex-smokers was substantially lower in THIN both *before*  
7 and *after* imputation compared to the HSE. This suggests that current smokers  
8 may be adequately identified using primary care data and most people with  
9 missing data on smoking status are likely to be either ex or non-smokers. This  
10 has clinical importance as smoking status (including ex-smoking) may be used to  
11 identify those at risk of disease, for example chronic obstructive pulmonary  
12 disease or cardiovascular disease.  
13  
14  
15  
16  
17  
18  
19  
20  
21  
22  
23  
24  
25  
26  
27  
28

29 In this study we further investigate recording of smoking status in primary care  
30 and explore potential reasons for the discrepancy in the proportion of ex-smokers  
31 between primary care records and the HSE. Specifically, we seek to deduce  
32 when ex-smokers may not be recorded as such in primary care records based on  
33 information about time since quitting in the HSE. Finally, we aim to provide a  
34 practical solution for imputation of missing smoking status records in routinely  
35 collected clinical data.  
36  
37  
38  
39  
40  
41  
42  
43  
44  
45  
46  
47

## 48 **METHODS**

### 49 **Study populations**

50 We used data from THIN primary care database, from practices in England that  
51 had passed data quality checks, to ensure they were using their computer  
52  
53  
54  
55  
56  
57  
58  
59  
60

1  
2  
3 system to record all patient consultations.[24-26] In the United Kingdom (UK)  
4  
5 98% of the population are registered with a National Health Service (NHS)  
6  
7 general practitioner to receive routine healthcare.[27] THIN is broadly  
8  
9 representative of all general practices in the UK in terms of age and sex of  
10  
11 patients, practice size and geographical distribution.[28] The database contains  
12  
13 information on socio demographics, symptoms, diagnoses, referrals to secondary  
14  
15 care, prescribing, results of tests and health status indicators. The data provider  
16  
17 (CSD-MR) obtained overall ethical approval from the South East MREC  
18  
19 (MREC/03/01/073) and this study was further approved by a THIN scientific  
20  
21 review committee.  
22  
23  
24  
25  
26  
27  
28

29 For this study we selected patients aged 16 years or over who registered with a  
30  
31 general practice between 1st January 2008 and 31st December 2009  
32  
33 (N=354,204) and were registered for at least a year. We examined records from  
34  
35 the first year after the patient registered, hence using data up to the end of 2010.  
36  
37 Many people have a “new patient check” soon after registration, where  
38  
39 information on demographics, health indicators and disease status is collected.  
40  
41  
42  
43  
44  
45

46 We compared the distribution of smoking status with that in the HSE from 2008  
47  
48 for those aged 16 years or over (N=15,102). The HSE is a national annual cross  
49  
50 sectional interview based survey of approximately 22,000 people.[29] The  
51  
52 survey includes questions on socio demographics, general health and  
53  
54 information on smoking status. The HSE has nearly complete records of  
55  
56  
57  
58  
59  
60

1  
2  
3 smoking (99.3%) and we therefore used the data from patients with complete  
4  
5 smoking information.  
6  
7  
8  
9

### 10 **Definition of smoking status**

11  
12 In THIN, smoking status was recorded by self-report. In many general practices  
13  
14 this would be on the basis of a questionnaire submitted at the time of registration,  
15  
16 whereas in other general practices this would be recorded in conjunction with a  
17  
18 clinical consultation with the general practitioner or practice nurse. GPs and  
19  
20 nurses may be more interested in the separation between current non-smokers  
21  
22 and smokers, thus the non-smoking categories may include some people who  
23  
24 are never smokers as well as some who are ex-smokers in primary care records.  
25  
26  
27

28  
29 . In THIN we extracted smoking status data either using Read codes[30] which  
30  
31 were classified into non-smoker, ex-smoker and smoker with clinical input, or we  
32  
33 used the categorisation (non-smoker, ex-smoker or current smoker) provided in  
34  
35 the Additional Health Data. In the HSE, smoking status was defined on the basis  
36  
37 of a series of questions (see Appendix 1) and individuals who had ever smoked  
38  
39 (but did not smoke at the time of the interview) would be defined as ex-smokers,  
40  
41 regardless of their age at quitting and length of time since they quit. The HSE  
42  
43 holds information on when ex-smokers quit so that age at the time they quit can  
44  
45 be deduced, whereas this information was not consistently available in THIN.  
46  
47  
48  
49  
50

### 51 **Statistical analyses**

52  
53  
54  
55  
56  
57  
58  
59  
60

1  
2  
3 Initially, we examined smoking status (smoker, ex-smoker, non-smoker or  
4 missing) in THIN and the HSE, overall, by age group, gender and Index of  
5 Multiple Deprivation 2004 (IMD) quintile[31]. Then we used multiple imputation  
6 to impute missing data in THIN. Multiple imputation via full conditional  
7 specification was performed using Stata's "ice" command. [32, 33] Multiple  
8 imputation is a statistical method which uses the data available to model the  
9 likely distribution of missing data.[20] A number of imputed datasets are  
10 produced in each of which plausible values are drawn from the imputation model.  
11 The method is designed to correctly reflect the uncertainty surrounding the  
12 missing values. With an appropriate imputation model, multiple imputation is an  
13 unbiased method of accounting for missing data. It is usually performed under  
14 the missing at random (MAR) assumption, but it may also be performed under  
15 specific missing not at random (MNAR) assumptions. These methods have been  
16 described in greater detail elsewhere.[20, 34-36]

17  
18  
19  
20  
21  
22  
23  
24  
25  
26  
27  
28  
29  
30  
31  
32  
33  
34  
35  
36  
37  
38  
39 After preliminary analysis,[34] we included the following variables in the multiple  
40 imputation models: age in years, gender and IMD quintile,[31] health indicators:  
41 smoking status (three categories, non, ex and current smoker), height, weight,  
42 systolic and diastolic blood pressures and disease indicators: type II diabetes,  
43 coronary heart disease (CHD) and cerebrovascular accident (CVA). There were  
44 missing values for smoking status, blood pressure, weight, height and IMD  
45 quintile. . Within the full conditional specification imputation algorithm,  
46 continuous variables were imputed using multiple linear regression, smoking  
47  
48  
49  
50  
51  
52  
53  
54  
55  
56  
57  
58  
59  
60

1  
2  
3 status using multinomial regression and IMD quintile using ordered logistic  
4 regression. Percentages in each smoking category were obtained using Rubin's  
5 Rules.[37] In the first multiple imputation we assumed that smoking data were  
6 MAR and hence allowed imputed smoking data of either smokers, non-smokers  
7 or ex-smokers (using a MAR assumption; hereafter referred to as MAR MI). In  
8 the second multiple imputation we assumed that all smokers had been recorded  
9 (so that smoking data were MNAR) and we imputed missing smoking data as  
10 either ex-smokers or non-smokers (hereafter referred to as MNAR MI).  
11  
12  
13  
14  
15  
16  
17  
18  
19  
20  
21  
22  
23

24 Following multiple imputation we carried out age-specific direct standardisation  
25 using the HSE as the standard population and the age-specific proportion in each  
26 smoking category from THIN. This was done to account for the fact that the  
27 mean age in the HSE was 49 years while the mean age in THIN was 38 years in  
28 the year after registration.  
29  
30  
31  
32  
33  
34  
35  
36  
37  
38

39 We deduced the average time after which an ex-smoker is no longer classified as  
40 an ex-smoker in primary care records by combining information from the HSE on  
41 when ex-smokers quit and the age-specific distribution of ex-smokers in THIN  
42 after imputation of non and ex-smokers. This was done by ranking the  
43 individuals in the HSE in accordance to the length of time since they quit by 10  
44 year age groups and then 'reclassifying' individuals who had quit the longest time  
45 ago within each age group from ex to non until we reached the same proportion  
46 of ex-smokers in the HSE as in THIN. By doing this, we were able to estimate  
47  
48  
49  
50  
51  
52  
53  
54  
55  
56  
57  
58  
59  
60

1  
2  
3 the average time that elapses from quitting smoking after which true ex-smokers  
4 are recorded as non-smokers in primary care records.  
5  
6  
7  
8  
9

## 10 **RESULTS**

11  
12 In total, 354,204 individuals were included from 366 general practices in THIN  
13 and 15,102 individuals from the HSE. Individuals in THIN were, on average 11  
14 years younger than those in the HSE (38 years versus 49 years, respectively)  
15 (Table 1). Smoking status was recorded for 84% in THIN within one year of  
16 initial registration. Before multiple imputation of missing data, a greater  
17 proportion of people were recorded as smokers in THIN than the HSE (24%  
18 versus 21% respectively), and the proportions of ex-smokers and non-smokers  
19 differed substantially between THIN and the HSE (Table 1).  
20  
21  
22  
23  
24  
25  
26  
27  
28  
29  
30  
31  
32  
33  
34  
35  
36  
37  
38  
39  
40  
41  
42  
43  
44  
45  
46  
47  
48  
49  
50  
51  
52  
53  
54  
55  
56  
57  
58  
59  
60

Table 1: Summary statistics for THIN in the first year of registration and the HSE 2008

| Variable               | THIN    |      | HSE   |      |
|------------------------|---------|------|-------|------|
|                        | n       | %    | n     | %    |
| Male                   | 164,085 | 46   | 6,760 | 45   |
| Female                 | 190,119 | 54   | 8,342 | 55   |
| Missing sex            |         | 0    |       | 0    |
| Non-smoker             | 165,618 | 47   | 7,874 | 52   |
| Ex-smoker              | 49,874  | 14   | 3,966 | 26   |
| Current smoker         | 83,526  | 24   | 3,158 | 21   |
| Missing smoking status | 55,186  | 16   | 104   | 1    |
| Age years mean (SD)    | 38      | (17) | 49    | (19) |
| Missing age            |         | 0    |       | 0    |
| Least deprived         | 69,104  | 20   | 3,321 | 22   |
| Quintile 2             | 71,771  | 20   | 3,039 | 20   |
| Quintile 3             | 66,422  | 19   | 3,010 | 20   |
| Quintile 4             | 71,789  | 20   | 2,928 | 19   |
| Most deprived          | 52,120  | 15   | 2,804 | 19   |
| Missing IMD            | 22,998  | 6    | 0     | 0    |

Abbreviations: HSE Health Survey for England 2008; THIN The Health Improvement Network.

Our first analyses used missing as a separate category of smoking, so we refer to those with reported smoking status as “known smokers” and “known ex-smokers”. The proportion of known smokers by age group was similar in THIN and the HSE between 30 and 79 years, but this was not the case for the proportions of known ex-smokers and non-smokers (Figure 1). In the HSE, the proportion of ex-smokers increased from 12% within the 20-29 age group to 46% in the 80-89 age group. In THIN, the proportion of known ex-smokers also increased with age although the overall proportion of known ex-smokers was smaller than in the HSE for all age groups after 20-29 years. Conversely, in the HSE, the proportion of non-smokers decreased slightly from 56% in the 20-29



1  
2  
3 age group to 48% in the 80-89 age group. Within THIN, the proportion of known  
4 non-smokers remained constant with increasing age at around 43%. The  
5 proportion of missing smoking data in THIN was relatively constant at less than  
6 20% until the 70-79 years age group, but increased substantially thereafter  
7 (Figure 1).  
8  
9  
10  
11  
12  
13  
14

15  
16  
17  
18 (Figure 1 here)  
19  
20  
21

22 In THIN, the percentage of non-smokers was greater for women (52%) than men  
23 (40%) while the percentage of known smokers was smaller for women (21%)  
24 than men (27%). There were similar trends in the HSE, although the percentage  
25 differences between sexes were smaller (smokers: 22% of men versus 20% of  
26 women).  
27  
28  
29  
30  
31  
32  
33  
34  
35

36 The proportions in each smoking status category varied substantially by social  
37 deprivation in both THIN and the HSE (Figure 2). In THIN, the percentage of  
38 non-smokers decreased from 52% in the least deprived quintile to 40% in the  
39 most deprived quintile. The percentage of known ex-smokers decreased slightly  
40 with increasing deprivation. In contrast, the percentage of known smokers  
41 increased with increasing deprivation from 16% in the least deprived quintile to  
42 34% in the most deprived quintile (Figure 2). The patterns were similar in the  
43 HSE although the proportion of ex-smokers was substantially larger across all  
44 levels of deprivation in the HSE compared to THIN.  
45  
46  
47  
48  
49  
50  
51  
52  
53  
54  
55  
56  
57  
58  
59  
60

1  
2  
3  
4  
5  
6 (Figure 2 here)  
7  
8  
9

### 10 **Analyses imputing missing smoking status**

11  
12 After MAR MI of THIN, age-standardised smoking prevalences still differed  
13 somewhat between THIN and the HSE. For example, 22% were ex-smokers in  
14 THIN compared with 26% in the HSE; 25% were smokers in THIN, compared  
15 with 21% in the HSE (Table 2).  
16  
17  
18  
19  
20  
21

22  
23  
24 After MNAR MI of THIN (that is, specifying that missing values are either ex-  
25 smokers or non-smokers), the age-standardised prevalence of smoking in THIN  
26 was similar to that in the HSE (Table 2). However, the age-specific prevalence of  
27 ex-smokers was still greater in the HSE than in THIN. Age-specific analysis  
28 showed that this difference was greatest at older ages, and indeed reversed at  
29 younger ages. This suggested that individuals who had quit in the less recent  
30 past might be classified as non-smokers in THIN but as ex-smokers in  
31 HSE.(Figure 3).  
32  
33  
34  
35  
36  
37  
38  
39  
40  
41  
42  
43  
44  
45  
46  
47  
48  
49  
50  
51  
52  
53  
54  
55  
56  
57  
58  
59  
60

Table 2: Percentages within each smoking status for THIN and the HSE 2008 after various adjustments

| Category   | THIN             |                             |                             | HSE      |                                       |
|------------|------------------|-----------------------------|-----------------------------|----------|---------------------------------------|
|            | Complete records | After MAR MI. <sup>ab</sup> | After MNAR MI <sup>ac</sup> | Observed | Reclassifying ex-smokers <sup>d</sup> |
|            | %                | %                           | %                           | %        | %                                     |
| Non-smoker | 55               | 53                          | 57                          | 53       | 57                                    |
| Ex-smoker  | 17               | 22                          | 23                          | 26       | 22                                    |
| Smoker     | 28               | 25                          | 20                          | 21       | 21                                    |

Abbreviations: HSE Health Survey for England 2008; THIN The Health Improvement Network.

<sup>a</sup> Directly standardised using the HSE age distribution as standard.

<sup>b</sup> Imputed assuming that missing values are smokers, non-smokers or ex-smokers

<sup>c</sup> Imputed assuming that missing values are non-smokers or ex-smokers

<sup>d</sup> Within each age group, reclassifying the optimum number of ex-smokers as non-smokers based on the distributions shown after MNAR MI.

(Figure 3 here)

The median time since ex-smokers quit in the HSE varied greatly by age group (Table 3), from two years (Interquartile range (IQR): 0, 3) in the under 20s to 40 (IQR: 25, 51) years in those aged 90 or over (Table 3). Equating proportions of ex-smokers in THIN to that in the HSE data suggested the typical time-window after which patients are no longer regarded as ex-smokers in primary care, but instead regarded as non-smokers, varied with age. Thus, typically individuals who registered with a general practice when they were in their forties would no longer be recorded as an ex-smoker if they quit more than 22 years earlier (when they were between 18 and 27 years of age) (Table 3). Individuals registering in their seventies would typically no longer be recorded as ex-smokers if they quit 42 years earlier (when they were between the ages of 28 and 37 years) (Table 3). Yet, most individuals who quit after the age of 30 would still be captured as

ex-smokers when they later registered with a new general practice. Using these age-specific extrapolations to reclassify ex-smokers as non-smokers in the HSE according to when they quit, we can see that the age-specific distributions of ex-smokers in THIN and the reclassified HSE are similar (Figure 3).

Table 3: Age specific centiles of time since quitting smoking in the HSE 2008

| Age group | Median time since quitting (years) | Extrapolated number of years since quitting | Extrapolated age when they quit |
|-----------|------------------------------------|---------------------------------------------|---------------------------------|
| <20       | 2                                  | *                                           | *                               |
| 20-29     | 3                                  | *                                           | *                               |
| 30-39     | 5                                  | 14                                          | 16 - 25                         |
| 40-49     | 10                                 | 22                                          | 18 - 27                         |
| 50-59     | 20                                 | 30                                          | 20 - 29                         |
| 60-69     | 24                                 | 35                                          | 25 - 34                         |
| 70-79     | 30                                 | 42                                          | 28 - 37                         |
| 80-89     | 32                                 | 40                                          | 40 - 49                         |
| 90+       | 40                                 | 46                                          | 44+                             |

\*Not possible to assign an optimal value for reclassification to these age groups  
Abbreviations: HSE Health Survey for England 2008

## DISCUSSION

The proportion of newly registered patients in THIN between 2008 and 2009 with a record of being a smoker was slightly higher than the HSE in 2008. However, the proportion of individuals recorded as ex-smokers and non-smokers differed substantially between THIN and the HSE. Overall, a larger proportion of individuals were recorded as ex-smokers in the HSE than in THIN and this increased with age. Likewise, the proportion of ex-smokers was substantially larger across all levels of deprivation in the HSE compared to THIN.

1  
2  
3 Under MAR MI there was a greater percentage of smokers (25%) and a smaller  
4 percentage of ex-smokers (22%) in THIN compared with the HSE (smokers 21%,  
5 ex-smokers 26%). However, MNAR MI (assuming all missing data were either  
6 ex-smokers or non-smokers) slightly increased the proportion of non-smokers  
7 (57%) in THIN compared to the HSE (53%), whereas the proportion of ex-  
8 smokers (23%) was slightly lower in THIN. Moreover, the latter imputation  
9 resulted in a relatively larger percentage of ex-smokers in THIN in those aged  
10 under 30 years compared with the HSE. This may be because the imputation  
11 model was unable to distinguish between ex and non-smokers in those age  
12 groups as both are unlikely to have developed typical later onset diseases which  
13 are key predictors of smoking status in the imputation model.  
14  
15  
16  
17  
18  
19  
20  
21  
22  
23  
24  
25  
26  
27  
28  
29  
30  
31

32 There may be several reasons for the discrepancy in the distribution of the  
33 smoking categories between THIN and the HSE. In the HSE, the definition of an  
34 ex-smoker was highly sensitive and clearly defined.[29] Thus respondents were  
35 categorised as ex-smokers even if they were a trivial smoker, smoked for a short  
36 period of time and/ or quit many decades ago. Also, the HSE used computer  
37 aided personal interviewing; where questions were read to the respondent in a  
38 standardised way from the screen and a detailed sequence of questions were  
39 asked to ascertain current smoking status. In primary care, while smoking status  
40 is systematically recorded in medical records, there is no detailed protocol for  
41 recording smoking status and the ascertainment is thus likely to vary by how the  
42 information was obtained. Many practices use self-report questionnaires at  
43  
44  
45  
46  
47  
48  
49  
50  
51  
52  
53  
54  
55  
56  
57  
58  
59  
60

1  
2  
3 registration including smoking status. Smoking status is then updated by health  
4 professionals (general practitioners and/ or practice nurses) during consultations  
5  
6 where smoking status is often recorded as part of an assessment of current or  
7  
8 future disease risk.  
9  
10  
11

12  
13  
14  
15 Our examination of the age-standardised data suggests that typically an ex-  
16 smoker in primary care settings is recorded as a non-smoker when they quit at a  
17 young age or had not smoked for a substantial time period. This could be  
18 because the patient may not volunteer previous smoking in either initial self-  
19 report questionnaire or on questioning by clinicians when it was minor, long ago  
20 or they consider it not relevant to their current or future health. It is possible that  
21 patients are more reluctant to volunteer ex-smoking habits when data are being  
22 held on their medical record and is not anonymous. However, comparing the  
23 proportion of individuals with a smoking record in THIN with that of the HSE we  
24 found a similar distribution suggesting that most smokers were identified in the  
25 first year of their registration in primary care. Similar findings have been  
26 observed in the literature by calendar year.[18] With the introduction of the  
27 Quality and Outcomes Framework in 2004, there has also been increased  
28 incentive to identify smokers in relation to specific disease outcomes.[38, 39]  
29 Indeed we found in our previous study that those with respiratory and cardiac  
30 conditions were more likely to have any smoking status recorded within the first  
31 year of registration.[13] Smoking status was validated in the HSE in 2007 by the  
32 use of saliva cotinine samples and was found to be accurate[40].  
33  
34  
35  
36  
37  
38  
39  
40  
41  
42  
43  
44  
45  
46  
47  
48  
49  
50  
51  
52  
53  
54  
55  
56  
57  
58  
59  
60

1  
2  
3  
4  
5  
6 The method of age standardisation then deducing the average time since quitting  
7  
8 and reclassifying them to non-smokers in the HSE is relatively crude and  
9  
10 assumes that everyone who becomes an ex-smoker does so at the same time in  
11  
12 their lives as others in their age group. However, it is likely to be indicative of  
13  
14 reporting of smoking status at the GP practice, given the results shown in this  
15  
16 study.  
17  
18  
19  
20

21  
22 An alternative method of dealing with unobserved smoking data is to dichotomise  
23  
24 smoking status into current smokers and non-current smokers with missing data  
25  
26 assumed to be non-current smokers. However, it should be noted that this  
27  
28 solution may be to the detriment of some epidemiological studies where ex-  
29  
30 smokers who quit recently are at greater risk of disease than non-smokers. For  
31  
32 example, the 50 year follow up of male British doctors shows that ex-smokers  
33  
34 had elevated age standardised mortality rates for many diseases.[41, 42]  
35  
36  
37  
38  
39  
40

41 Our findings suggest that *in contrast* to health surveys, patients who quit smoking  
42  
43 at a young age (before 25-30) are likely to be recorded by their general practice  
44  
45 as a non-smoker instead of an ex-smoker. This has implications for researchers  
46  
47 using these data sources. To our knowledge this is the first study which seeks to  
48  
49 deduce and quantify typical time between when a smoker quit and when they are  
50  
51 no longer perceived as an ex-smoker in primary care. Clinicians, policy-makers  
52  
53 and researchers who wish to use smoking status in primary care records to  
54  
55  
56  
57  
58  
59  
60

1  
2  
3 identify populations at risk of smoking-related diseases can be reassured by our  
4  
5 findings that using data from new registrations, most current smokers will be  
6  
7 identified and misclassification of ex-smokers is more likely to have occurred in  
8  
9 those who have quit smoking at an early age and/ or a long time ago.  
10  
11  
12  
13  
14  
15  
16  
17  
18  
19  
20  
21  
22  
23  
24  
25  
26  
27  
28  
29  
30  
31  
32  
33  
34  
35  
36  
37  
38  
39  
40  
41  
42  
43  
44  
45  
46  
47  
48  
49  
50  
51  
52  
53  
54  
55  
56  
57  
58  
59  
60

For peer review only



### **Conflict of interest and funding**

The authors have no conflicts of interest to declare. This study is funded by a UK Medical Research Council grant [G0900701]. The funder had no influence over the study design, results or decision to publish this work. JRC was funded by a UK Economic and Social Research Council research fellowship grant [RES-063-27-0257]. IRW was funded by a United Kingdom Medical Research Council grant [U105260558].

### **Author contributions**

LM extracted and analysed the data and wrote the first draft of the paper with help from IP and JRC. KRW and IN provided clinical input and IRW and RWM provided additional statistical input. All authors commented on the paper and helped write subsequent drafts.

### **Data sharing statement**

No additional data available.

I Dr Louise Marston the Corresponding Author of this article contained within the original manuscript which includes any diagrams & photographs, other illustrative material, video, film or any other material howsoever submitted by the Contributor(s) at any time and related to the Contribution (“the Contribution”) have the right to grant on behalf of all authors and do grant on behalf of all authors, a licence to the BMJ Publishing Group Ltd and its licensees, to permit this Contribution (if accepted) to be published in BMJ Open and any other BMJ Group products and to exploit all subsidiary rights, as set out in the licence at:

[http://group.bmj.com/products/journals/instructions-for-authors/BMJOpen\\_licence.pdf](http://group.bmj.com/products/journals/instructions-for-authors/BMJOpen_licence.pdf)

## References

1 Office for National Statistics Opinions and Lifestyle Survey, Smoking Habits Amongst Adults, 2012; 2013 ([http://www.ons.gov.uk/ons/dcp171776\\_328041.pdf](http://www.ons.gov.uk/ons/dcp171776_328041.pdf)) (accessed January 2014)

2 Davies AR, Smeeth L, Grundy EMD. Contribution of changes in incidence and mortality to trends in the prevalence of coronary heart disease in the UK: 1996-2005. *Eur Heart J* 2007;2142-2147.

3 Delaney JAC, Daskalopoulou SS, Brophy JM et al Lifestyle variables and the risk of myocardial infarction in the general practice research database (electronic article). *BMC Cardiovasc Disord* 2007;38.

4 Douglas IJ, Smeeth L. Exposure to antipsychotics and risk of stroke: self controlled case series study (electronic article). *Br Med J* 2008;

5 Gelfand JM, Neimann AL, Shin DB et al Risk of myocardial infarction in patients with psoriasis. *JAMA* 2006;1735-1741.

6 Hippisley-Cox J, Coupland C, Vinogradova Y et al Derivation and validation of QRISK, a new cardiovascular disease risk score for the United Kingdom: prospective open cohort study. *Br Med J* 2007;136-141.

1  
2  
3 7 Osborn DPJ, Levy G, Nazareth I et al Relative risk of cardiovascular and  
4 cancer mortality in people with severe mental illness from the United Kingdom's  
5 General Practice Research Database. *Arch Gen Psychiatry* 2007;242-249.  
6  
7  
8  
9

10  
11  
12 8 Smeeth L, Thomas SL, Hall AJ et al Risk of myocardial infarction and stroke  
13 after acute infection or vaccination. *N Engl J Med* 2004;2611-2618.  
14  
15  
16  
17

18  
19  
20 9 Walters K, Rait G, Petersen I et al Panic disorder and risk of new onset  
21 coronary heart disease, acute myocardial infarction, and cardiac mortality: cohort  
22 study using the general practice research database. *Eur Heart J* 2008;2981-  
23 2988.  
24  
25  
26  
27

28  
29  
30  
31 10 Horsfall LJ, Rait G, Walters K et al Serum Bilirubin and Risk of Respiratory  
32 Disease and Death *JAMA* 2011;691-697  
33  
34  
35  
36

37  
38  
39 11 Kiri VA, Fabbri LM, Davis KJ et al Inhaled corticosteroids and risk of lung  
40 cancer among COPD patients who quit smoking *Respir Med* 2009;85-90  
41  
42  
43  
44

45  
46 12 Horsfall LJ, Nazareth I, Petersen I. Cardiovascular Events as a Function of  
47 Serum Bilirubin Levels in a Large Statin-Treated Cohort. *Circulation* 2012;2556-  
48 2564  
49  
50  
51  
52

1  
2  
3 13 Szatkowski L, Lewis S, McNeill A et al Is smoking status routinely recorded  
4 when patients register with a new GP? *Fam Pract* 2010;673–675  
5  
6  
7

8  
9  
10 14 Dhalwani NN, Tata LJ, Coleman T, et al. Completeness of Maternal Smoking  
11 Status Recording during Pregnancy in United Kingdom Primary Care Data. *PLoS*  
12 *One* 2013;e72218  
13  
14  
15

16  
17  
18 15 Szatkowski L, Lewis S, McNeill A et al Can data from primary care medical  
19 records be used to monitor national smoking prevalence? *J Epidemiol*  
20 *Community Health* 2012;791-795.  
21  
22  
23  
24  
25

26  
27  
28 16 Langley TE, Szatkowski LC, Wythe S, et al Can primary care data be used to  
29 monitor regional smoking prevalence? An analysis of The Health Improvement  
30 Network primary care data *BMC Public Health* 2011, 11:773  
31  
32  
33  
34  
35

36  
37  
38 17 Coleman T, Lewis S, Hubbard R et al Impact of contractual financial  
39 incentives on the ascertainment and management of smoking in primary care.  
40 *Addiction* 2007;102:803e8.  
41  
42  
43  
44  
45

46  
47  
48 18 Marston L, Carpenter JR, Walters KR et al Issues in multiple imputation of  
49 missing data for large general practice clinical databases *Pharmacoepidemiol*  
50 *Drug Saf* 2010;618–626  
51  
52  
53  
54  
55

1  
2  
3 19 Weiner MG, Barnhart K, Xie D et al Hormone therapy and coronary heart  
4 disease in young women. *Menopause* 2008;86-93.  
5  
6  
7

8  
9  
10 20 Sterne JAC, White IR, Carlin JB et al. Multiple imputation for missing data in  
11 epidemiological and clinical research: potential and pitfalls. *Br Med J* 2009;b2393  
12  
13  
14

15  
16  
17 21 Carpenter J, Kenward M Multiple imputation and its application 2013 Wiley  
18  
19

20  
21  
22 22 Hippisley-Cox J, Coupland C, Vinogradova Y et al Predicting cardiovascular  
23 risk in England and Wales: prospective derivation and validation of QRISK2. *Br*  
24 *Med J* 2008;1475-1482  
25  
26  
27

28  
29  
30  
31 23 Collins GS, Altman DG An independent and external validation of QRISK2  
32 cardiovascular disease risk score: a prospective open cohort study *Br Med J*  
33 2010;c2442  
34  
35  
36  
37

38  
39  
40  
41 24 The Health Improvement Network The Health Improvement Network. London:  
42 The Health Improvement Network; 2014 (<http://csdmruk.cegedim.com/>)  
43  
44  
45  
46 (Accessed January 2014).  
47

48  
49  
50 25 Horsfall L, Walters K, Petersen I. [Identifying periods of acceptable computer](#)  
51 [usage in primary care research databases](#). *Pharmacoepidemiol Drug Saf* 2013;  
52  
53  
54  
55 64-69  
56  
57  
58  
59  
60

1  
2  
3  
4  
5  
6 26 Maguire A, Blak BT, Thompson M. [The importance of defining periods of](#)  
7 [complete mortality reporting for research using automated data from primary](#)  
8 [care](#). *Pharmacoepidem Drug Safe* 2009; 76-83.  
9  
10

11  
12  
13  
14  
15 27 Lis Y, Mann RD The VAMP Research multi-purpose database in the U.K. *J*  
16 *Clin Epidemiol* 1995;431-443.  
17  
18

19  
20  
21  
22 28 Blak BT, Thompson M, Dattani H, et al Generalisability of The Health  
23 Improvement Network (THIN) database: demographics, chronic disease  
24 prevalence and mortality rates. *Inform Prim Care* 2011;251-255.  
25  
26  
27

28  
29  
30  
31 29 National Centre for Social Research and University College London.  
32 Department of Epidemiology and Public Health, *Health Survey for England, 2008*  
33 [computer file]. *2nd Edition*. Colchester, Essex: UK Data Archive [distributor],  
34 October 2010. SN: 6397  
35  
36  
37  
38  
39

40  
41  
42  
43 30 Booth N What are the Read Codes? *Health Libr Rev* 1994;177-82  
44  
45  
46  
47

48 31 Noble M, Wright G, Dibben C et al Indices of Deprivation 2004. Report to the  
49 Office of the Deputy Prime Minister. London: Neighbourhood Renewal Unit; 2004  
50 (<http://webarchive.nationalarchives.gov.uk/20120919132719/http://www.communi>  
51 [ties.gov.uk/documents/communities/pdf/131209.pdf](http://www.communities.gov.uk/documents/communities/pdf/131209.pdf)) (Accessed January 2014)  
52  
53  
54  
55  
56  
57  
58  
59  
60

1  
2  
3  
4  
5  
6 32 Stata Corporation. *Stata Statistical Software: Release 11*. College Station, TX:  
7  
8 Stata Corporation; 2009  
9

10  
11  
12 33 Royston P Multiple imputation of missing values: Update of ice. *Stata Journal*  
13 2005;527-536.  
14  
15  
16

17  
18  
19  
20 34 Spratt M, Carpenter J, Sterne JAC et al Strategies for Multiple Imputation in  
21  
22 Longitudinal Studies *Am. J. Epidemiol.* 2010;478-487  
23  
24

25  
26  
27 35 White IR, Royston P, Wood A Multiple imputation using chained equations:  
28  
29 issues and guidance for practice (tutorial). *Stat Med* 2011;377-399  
30  
31

32  
33  
34 36 Graham JW Missing data analysis: Making it work in the real world *Annu Rev*  
35  
36 *Psychol* 2009;549-576  
37

38  
39 37 Rubin DB *Multiple imputation for non-response in surveys*. New York: John  
40  
41 Wiley and Sons; 1987  
42  
43

44  
45  
46 38 The British Medical Association and NHS Employers Quality and Outcomes  
47  
48 Framework guidance for GMS contract 2011/12; 2011  
49  
50 ([http://www.nhsemployers.org/Aboutus/Publications/Documents/QOF\\_guidance\\_](http://www.nhsemployers.org/Aboutus/Publications/Documents/QOF_guidance_GMS_contract_2011_12.pdf)  
51  
52 [GMS\\_contract\\_2011\\_12.pdf](http://www.nhsemployers.org/Aboutus/Publications/Documents/QOF_guidance_GMS_contract_2011_12.pdf)) (Accessed January 2014)  
53  
54  
55  
56  
57  
58  
59  
60

1  
2  
3 39 Campbell S, Reeves D, Kontopantelis E et al Quality of Primary Care in  
4  
5  
6 England with the Introduction of Pay for Performance *N Engl J Med* 2007;181-  
7  
8 190  
9

10  
11  
12 40 Wardle H, Mindell J Adult cigarette smoking. In Craig R, Shelton N (Ed.),  
13  
14 Health Survey for England 2007. Volume 1. Healthy lifestyles: Knowledge,  
15  
16 attitudes and behaviour. 2008;149-176 NHS Information Centre.  
17  
18  
19

20  
21  
22 41 Doll R, Peto R, Boreham J et al Mortality in relation to smoking: 50 years'  
23  
24 observations on male British doctors *Br Med J* 2004,  
25  
26 doi:10.1136/bmj.38142.554479.AE  
27  
28  
29

30  
31  
32 42 Kenfield SA, Wei EK, Rosner BA et al Burden of smoking on cause-specific  
33  
34 mortality: application to the Nurses' Health Study *Tob Control* 2010;248-254  
35  
36  
37  
38  
39  
40  
41  
42  
43  
44  
45  
46  
47  
48  
49  
50  
51  
52  
53  
54  
55  
56  
57  
58  
59  
60



1  
2  
3 Figure Legends  
4  
5

6 Figure 1: Smoking status percentages in THIN and the HSE 2008 by age group  
7

8 Figure 1 footnotes:

9 Solid line is the Health Survey for England 2008, dashed line is The Health  
10 Improvement Network (THIN)  
11  
12

13  
14 Figure 2: Smoking status percentages in THIN and the HSE 2008 by deprivation  
15 quintile  
16

17 Figure 2 footnotes:

18 \*IMD 1 is the least deprived and IMD 5 is the most deprived

19 Darker bars represent the HSE 2008, lighter bars represent THIN

20 Abbreviations: HSE Health Survey for England 2008, IMD Index of multiple  
21 deprivation, THIN The Health Improvement Network  
22  
23

24  
25  
26 Figure 3: Age group specific percentages of ex-smokers in THIN (after MNAR  
27 imputation) and the HSE 2008 (before and after reclassifying ex-smokers in the  
28 HSE who quit before the age specified in Table 3 column 3 to be non-smokers)  
29

30 Figure 3 footnotes:

31 Abbreviations: THIN The Health Improvement Network, HSE Health Survey for  
32 England 2008  
33  
34  
35  
36  
37  
38  
39  
40  
41  
42  
43  
44  
45  
46  
47  
48  
49  
50  
51  
52  
53  
54  
55  
56  
57  
58  
59  
60

1  
2  
3  
4  
5  
6  
7  
8 **Title: Smoker, ex-smoker or non-smoker? The validity of routinely**  
9 **recorded smoking status in UK primary care: a cross-sectional study**  
10  
11

12  
13  
14 **Authors**

15 Louise Marston<sup>1</sup>

16 James R Carpenter<sup>2,3</sup>

17 Kate R Walters<sup>1</sup>

18 Richard W Morris<sup>1</sup>

19 Irwin Nazareth<sup>1</sup>

20 Ian R White<sup>4</sup>

21 Irene Petersen<sup>1</sup>

22  
23  
24  
25  
26  
27  
28  
29  
30  
31  
32 <sup>1</sup>Department of Primary Care and Population Health, University College London,  
33 Rowland Hill Street, London, NW3 2PF, United Kingdom

34  
35 <sup>2</sup>Department of Medical Statistics, London School of Hygiene and Tropical  
36 Medicine, Keppel Street, London, WC1E 7HT, United Kingdom

37  
38  
39 <sup>3</sup> MRC Clinical Trials Unit, Kingsway, London

40  
41 <sup>4</sup>MRC Biostatistics Unit, Cambridge Institute of Public Health, University Forvie  
42 Site, Robinson Way, Cambridge, CB2 0SR, United Kingdom  
43  
44

45  
46  
47 Please address correspondence to:

48 Dr Louise Marston

49 Department of Primary Care and Population Health  
50  
51  
52  
53  
54

1  
2  
3  
4  
5  
6  
7  
8 University College London

9  
10 Rowland Hill Street

11  
12 London

13  
14 NW3 2PF

15  
16 United Kingdom

17  
18  
19  
20 l.marston@ucl.ac.uk

21  
22 Telephone: +44 20 7794 0500 (36768)

23  
24 Fax: +44 20 7794 1224

25  
26  
27 | Words: 3, ~~166~~376

**ABSTRACT**

**Objectives:** To investigate how smoking status is recorded in UK primary care; to evaluate ~~if~~ whether appropriate multiple imputation (MI) of smoking status yields results consistent with health surveys.

**Setting:** UK primary care and a population survey conducted in the community.

**Participants:** We identified 354,204 patients aged 16 or over in The Health Improvement Network (THIN) primary care database registered with their general practice 2008-2009 and 15,102 individuals aged 16 or over in the Health Survey for England (HSE).

**Outcome measures:** Age-standardised and, age-specific proportions of smokers, ex-smokers and non-smokers in THIN and the HSE before and after multiple imputation (MI). Using information on time since quitting in the HSE, we ~~extrapolated—estimated~~ when ex-smokers ~~may be considered~~ are typically recorded as non-smokers in primary care records.

**Results:** In THIN, smoking status was recorded for 84% of patients within one year of registration. Of these; 28% were smokers (21% in the HSE). After MI of missing smoking data, the proportion of smokers was 25% (missing at random) and 20% (missing not at random). With increasing age, more were identified as ex-smokers in the HSE than THIN. It appears that those who quit before the ages

1  
2  
3  
4  
5  
6  
7  
8  
9 | ~~of 25-30 years~~before age 30 were less likely to be recorded as an ex-smoker in  
10 primary care than people who quit later.  
11

12  
13  
14 | **Conclusions:** Smoking status ~~is~~was relatively well recorded in primary care.  
15 Misclassification of ex-smokers as non-smokers is likely to occur in those quitting  
16 smoking at an early age and/ or a long time ago. Those with no smoking status  
17 information are more likely to be ex or non-smokers ~~versus~~than smokers.  
18  
19  
20 |  
21  
22  
23

#### 24 **STRENGTHS AND LIMITATIONS OF THIS STUDY**

- 25 • This study includes data from 'real' life primary care electronic records
- 26 • First study to compare the definition of smoking status in primary care
- 27 ~~versus~~with a population survey
- 28 • Study focuses on data recorded in the first year after patient registration
- 29 and may not be applicable to other times.
- 30  
31  
32  
33  
34  
35  
36

37 **KEYWORDS:** recording of smoking, primary care databases, Health Survey for  
38 England, missing data, multiple imputation  
39  
40  
41  
42  
43  
44  
45  
46  
47  
48  
49  
50  
51  
52  
53  
54

## INTRODUCTION

A fifth of the British adult population are smokers [1] and there is still a need for further research into smoking and smoking related diseases including coronary heart disease and stroke, respiratory diseases and cancers. Routinely collected smoking data can be used in clinical practice to identify populations at risk of smoking-related diseases, such as identifying smokers to ~~have~~ undergo spirometry testing ~~to identify~~ detect these with for early diagnosis of Chronic Obstructive Pulmonary Disease (COPD), or to be invited for smoking cessation services. It is important to understand the accuracy of the data, and whether cases may be missed in those with no recorded smoking status. Electronic health records, including primary care databases, have proved to be very powerful resources for epidemiological and health research.[2-12], ~~—Electronic health records also allow~~ research that would be difficult to capture using primary research methods; for example, studying the elderly and people with severe mental illness.[4, 7, 9, 11] Additionally they include millions of patients giving power to study rare conditions. Nevertheless, as they are collected for clinical reasons, they raise a number of issues when used for research; not least of these is missing data.

In order to conduct such research, it is important to understand how smoking status is recorded in primary care and how missing data may be addressed.

There is evidence that the recording of smoking status has improved substantially in UK primary care[13, 14] and estimates of *current smoking* are

Formatted: Font: Italic

1  
2  
3  
4  
5  
6  
7  
8 similar to large population surveys.<sup>[15, 16]</sup> ~~and in~~ Most general practices now  
9 routinely record smoking status at regular intervals as a part of the Quality  
10 Outcome Framework.<sup>[4517]</sup> However, we do not know how the different and  
11 non-standardised classifications of ~~ex and, non and current~~ smokers in primary  
12 care records compared to the standardised recording of smoking status in  
13 population surveys such as the Health Survey for England (HSE).  
14  
15  
16  
17  
18  
19  
20

Formatted: Font: Italic

21 ~~In addition~~ As noted already, a proportion of patients still lack a smoking status  
22 record in their primary care records. It is unclear how to deal with these patients  
23 when conducting research where smoking status is either the outcome of the  
24 research or an explanatory factor for patients' health.<sup>[3, 6, 4618, 4719]</sup>  
25 Methodological research has demonstrated that including only patients with  
26 complete records can substantially bias the results, especially when the reason  
27 for missing data is associated with patient outcomes.<sup>[4820, 21]</sup> In recent years,  
28 efforts have been made to address missing data in primary care databases<sup>[3, 47,</sup>  
29 <sup>19, 22]</sup> using multiple imputation, though reporting on the comparability of the  
30 results of multiple imputation with population data has been sparse. Therefore, it  
31 is unclear whether multiple imputation accurately replicates data representing the  
32 population.<sup>[3, 6, 4719, 2023]</sup> Our previous work on missing data in The Health  
33 Improvement Network (THIN) primary care database showed that many health  
34 indicator measurements (for example, weight and blood pressure) recorded  
35 within the first year of patients' registration at a general practice were comparable  
36 with large external datasets before and after multiple imputation.<sup>[4618]</sup> However,  
37  
38  
39  
40  
41  
42  
43  
44  
45  
46  
47  
48  
49  
50  
51  
52

1  
2  
3  
4  
5  
6  
7  
8 smoking status was not directly comparable with data from the Health Survey for  
9 England (HSE). Although the proportion of smokers was similar between THIN  
10 and the HSE *before* multiple imputation of data in THIN, the proportion of  
11 smokers was substantially higher *after* multiple imputation in THIN. On the other  
12 hand, the proportion of ex-smokers was substantially lower in THIN both *before*  
13 and *after* imputation compared to the HSE. This suggests that current smokers  
14 may be adequately identified using primary care data and most people with  
15 missing data on smoking status are likely to be either ex or non-smokers. This  
16 has clinical importance as smoking status (including ex-smoking) may be used to  
17 identify those at risk of disease, for example chronic obstructive pulmonary  
18 disease or cardiovascular disease.  
19  
20  
21  
22  
23  
24  
25  
26  
27  
28  
29  
30

31 In this study we further investigate recording of smoking status in primary care  
32 and explore potential reasons for the discrepancy in the proportion of ex-smokers  
33 between primary care records and the HSE. Specifically, we seek to deduce  
34 when ex-smokers may not be recorded as such in primary care records based on  
35 information about time since quitting in the HSE. Finally, we aim to provide a  
36 practical solution for imputation of missing smoking status records in routinely  
37 collected clinical data.  
38  
39  
40  
41  
42  
43  
44  
45

## 46 **METHODS**

### 47 **Study populations**



1  
2  
3  
4  
5  
6  
7  
8 We used data from THIN primary care database, from practices in England that  
9 had passed data quality checks, to ensure they were using their computer  
10 system to record all patient consultations.<sup>[2424-26]</sup> In the United Kingdom (UK)  
11  
12 98% of the population are registered with a National Health Service (NHS)  
13  
14 general practitioner to receive routine healthcare.<sup>[2227]</sup> THIN is broadly  
15  
16 representative of all general practices in the UK in terms of age and sex of  
17  
18 patients, practice size and geographical distribution.<sup>[2328]</sup> The database  
19  
20 contains information on socio demographics, symptoms, diagnoses, referrals to  
21  
22 secondary care, prescribing, results of tests and health status indicators. The  
23  
24 data provider (CSD-MR) obtained overall ethical approval from the South East  
25  
26 MREC (MREC/03/01/073) and this study was further approved by a THIN  
27  
28 scientific review committee.  
29  
30  
31  
32

33 For this study we selected patients aged 16 years or over who registered with a  
34  
35 general practice between 1st January 2008 and 31st December 2009  
36  
37 (N=354,204) and were registered for at least a year. ~~w~~We examined records  
38  
39 from the first year after the patient registered, hence using data up to the end of  
40  
41 2010. Many people have a “new patient check” soon after registration, where  
42  
43 information on demographics, health indicators and disease status is collected.  
44  
45  
46

47 We compared the distribution of smoking status with that in the HSE from 2008  
48  
49 for those aged 16 years or over (N=15,102). The HSE is a national annual cross  
50  
51 sectional interview based survey of approximately 22,000 people.<sup>[2429]</sup> The  
52  
53  
54

1  
2  
3  
4  
5  
6  
7  
8 survey includes questions on socio demographics, general health and  
9 information on smoking status. The HSE has nearly complete records of  
10 smoking (99.3%) and we therefore used the data from patients with complete  
11 smoking information.  
12  
13  
14

### 15 16 17 18 **Definition of smoking status**

19 In THIN, smoking status was recorded by self-report. In many general practices  
20 this would be on the basis of a questionnaire submitted at the time of registration,  
21 whereas in other general practices this would be recorded in conjunction with a  
22  
23  
24

25  
26 GPs and  
27 nurses may be more interested in the separation between current non-smokers  
28 and smokers, thus the non-smoking categories may include some people who  
29 are never smokers as well as some who are ex-smokers in primary care records.  
30  
31 ~~Patients would be classed as current non-smoker, or current smokers. In some~~  
32 ~~instance the non-smokers would be classified as ex-smokers but this was~~  
33 ~~variably defined from one practice to another. In THIN we extracted smoking~~  
34 ~~status data either using Read codes[30] which were classified into non-smoker,~~  
35 ~~ex-smoker and smoker with clinical input, or we used the categorisation (non-~~  
36 ~~smoker, ex-smoker or current smoker) provided in the Additional Health Data. In~~  
37  
38  
39  
40  
41  
42  
43  
44

45 the HSE, smoking status was defined on the basis of a series of questions (see  
46 Appendix 1) and individuals who had ever smoked (but did not smoke at the time  
47 of the interview) would be defined as ex-smokers, regardless of their age at  
48 quitting and length of time since they quit. The HSE holds information on when  
49  
50  
51  
52  
53  
54

1  
2  
3  
4  
5  
6  
7  
8 ex-smokers quit so that age at the time they quit can be deduced, whereas this  
9 information was not consistently available in THIN.  
10

### 11 12 13 **Statistical analyses**

14  
15 Initially, we examined smoking status (smoker, ex-smoker, non-smoker or  
16 missing) in THIN and the HSE, overall, by age group, gender and Index of  
17 Multiple Deprivation 2004 (IMD) quintile[2531]. Then we used multiple  
18 imputation to impute missing ~~smoking status data~~ in THIN. Multiple imputation  
19 with chained equations via full conditional specification was performed using  
20 Stata's "ice" command. [32, 33] Multiple imputation is a statistical method which  
21 uses the data available to model the likely distribution of missing data.[4820] A  
22 number of imputed datasets are produced in each of which plausible values are  
23 drawn from the imputation model. The method is designed to correctly reflect the  
24 uncertainty surrounding the missing values. With an appropriate imputation  
25 model, multiple imputation is an unbiased method of accounting for missing data.  
26 It is usually performed under the missing at random (MAR) assumption, but it  
27 may also be performed under specific missing not at random (MNAR)  
28 assumptions. These methods have been described in greater detail  
29 elsewhere.[4820, 26-2834-36]  
30  
31  
32  
33  
34  
35  
36  
37  
38  
39  
40  
41  
42  
43  
44  
45

46  
47 After preliminary analysis,[2634] we included the following variables in the  
48 multiple imputation models: age in years, gender and IMD quintile,[2531] health  
49 indicators: smoking status (three categories, non, ex and current smoker), height,  
50  
51  
52  
53  
54

1  
2  
3  
4  
5  
6  
7  
8 weight, systolic and diastolic blood pressures and disease indicators: type II  
9 diabetes, coronary heart disease (CHD) and cerebrovascular accident (CVA).  
10  
11 ~~There were missing values for smoking status, blood pressure, weight, height~~  
12 ~~and IMD quintile. Multiple imputation was performed using Chained Equations~~  
13 ~~using the ice command using Stata 11.[29, 30]~~ Within the full conditional  
14 specification imputation algorithm, Continuous variables were imputed using  
15 multiple linear regression, smoking status using multinomial regression and IMD  
16 quintile using ordered logistic regression. Percentages in each smoking category  
17 were obtained using Rubin's Rules.<sup>[3437]</sup> In the first multiple imputation we  
18 assumed that smoking data were MAR and hence allowed imputed smoking data  
19 of either smokers, non-smokers or ex-smokers (using a MAR assumption;  
20 hereafter referred to as MAR MI). In the second multiple imputation we assumed  
21 that all smokers had been recorded (so that smoking data were MNAR) and we  
22 imputed missing smoking data as either ex-smokers or non-smokers (hereafter  
23 referred to as MNAR MI).  
24  
25  
26  
27  
28  
29  
30  
31  
32  
33  
34  
35  
36  
37  
38

39 Following multiple imputation we carried out age-specific direct standardisation  
40 using the HSE as the standard population and the age-specific proportion in each  
41 smoking category from THIN. This was done to account for the fact that the  
42 mean age in the HSE was 49 years while the mean age in THIN was 38 years in  
43 the year after registration.  
44  
45  
46  
47  
48  
49  
50  
51  
52  
53  
54

1  
2  
3  
4  
5  
6  
7  
8  
9  
10  
11  
12  
13  
14  
15  
16  
17  
18  
19  
20  
21  
22  
23  
24  
25  
26  
27  
28  
29  
30  
31  
32  
33  
34  
35  
36  
37  
38  
39  
40  
41  
42  
43  
44  
45  
46  
47  
48  
49  
50  
51  
52  
53  
54  
55  
56  
57  
58  
59  
60

We deduced the average time after which an ex-smoker is no longer classified as an ex-smoker in primary care records by combining information from the HSE on when ex-smokers quit and the age-specific distribution of ex-smokers in THIN after imputation of non and ex-smokers. This was done by ranking the individuals in the HSE in accordance to the length of time since they quit by 10 year age groups and then 'reclassifying' individuals who had quit the longest time ago within each age group from ex to non until we reached the same proportion of ex-smokers in the HSE as in THIN. [By doing this, we were able to estimate the average time that elapses from quitting smoking after which true ex-smokers are recorded as non-smokers in primary care records.](#)

## RESULTS

In total, 354,204 individuals were included from [366 general practices in](#) THIN and 15,102 [individuals](#) from the HSE. Individuals in THIN were, on average 11 years younger than those in the HSE (38 years versus 49 years, respectively) (Table 1). Smoking status was recorded for 84% in THIN within one year of initial registration. Before multiple imputation of missing data, a greater proportion of people were recorded as smokers in THIN than the HSE (24% versus 21% respectively), and the proportions of ex-smokers and non-smokers differed substantially between THIN and the HSE (Table 1).

Table 1: Summary statistics for THIN in the first year of registration and the HSE 2008

| Variable               | THIN          |           | HSE          |           |
|------------------------|---------------|-----------|--------------|-----------|
|                        | n             | %         | n            | %         |
| Male                   | 164,085       | 46        | 6,760        | 45        |
| Female                 | 190,119       | 54        | 8,342        | 55        |
| Missing sex            |               | 0         |              | 0         |
| Non-smoker             | 165,618       | 47        | 7,874        | 52        |
| Ex-smoker              | 49,874        | 14        | 3,966        | 26        |
| Current smoker         | 83,526        | 24        | 3,158        | 21        |
| Missing smoking status | 55,186        | 16        | 104          | 1         |
| Age years mean (SD)    | 38            | (17)      | 49           | (19)      |
| Missing age            |               | 0         |              | 0*        |
| <u>Least deprived</u>  | <u>69,104</u> | <u>20</u> | <u>3,321</u> | <u>22</u> |
| <u>Quintile 2</u>      | <u>71,771</u> | <u>20</u> | <u>3,039</u> | <u>20</u> |
| <u>Quintile 3</u>      | <u>66,422</u> | <u>19</u> | <u>3,010</u> | <u>20</u> |
| <u>Quintile 4</u>      | <u>71,789</u> | <u>20</u> | <u>2,928</u> | <u>19</u> |
| <u>Most deprived</u>   | <u>52,120</u> | <u>15</u> | <u>2,804</u> | <u>19</u> |
| <u>Missing IMD</u>     | <u>22,998</u> | <u>6</u>  | <u>0</u>     | <u>0</u>  |

Abbreviations: HSE Health Survey for England 2008; THIN The Health Improvement Network.

Our first analyses used missing as a separate category of smoking, so we refer to those with reported smoking status as “known smokers” and “known ex-smokers”. The proportion of known smokers by age group was similar in THIN and the HSE between 30 and 79 years, but this was not the case for the proportions of known ex-smokers and non-smokers (Figure 1). In the HSE, the proportion of ex-smokers increased from 12% within the 20-29 age group to 46% in the 80-89 age group. In THIN, the proportion of known ex-smokers also increased with age although the overall proportion of known ex-smokers was smaller than in the HSE for all age groups after 20-29 years. Conversely, in the HSE, the proportion of non-smokers decreased slightly from 56% in the 20-29

1  
2  
3  
4  
5  
6  
7  
8  
9  
10  
11  
12  
13  
14  
15  
16  
17  
18  
19  
20  
21  
22  
23  
24  
25  
26  
27  
28  
29  
30  
31  
32  
33  
34  
35  
36  
37  
38  
39  
40  
41  
42  
43  
44  
45  
46  
47  
48  
49  
50  
51  
52  
53  
54  
55  
56  
57  
58  
59  
60

age group to 48% in the 80-89 age group. Within THIN, the proportion of known non-smokers remained constant with increasing age at around 43%. The proportion of missing smoking data in THIN was relatively constant at less than 20% until the 70-79 years age group, but increased substantially thereafter (Figure 1).

(Figure 1 here)

In THIN, the percentage of non-smokers was greater for women (52%) than men (40%) while the percentage of known smokers was smaller for women (21%) than men (27%). There were similar trends in the HSE, although the percentage differences between sexes were smaller (smokers: 22% of men versus 20% of women).

The proportions in each smoking status category varied substantially by social deprivation in both THIN and the HSE (Figure 2). In THIN, the percentage of non-smokers decreased from 52% in the least deprived quintile to 40% in the most deprived quintile. The percentage of known ex-smokers decreased slightly with increasing deprivation. In contrast, the percentage of known smokers increased with increasing deprivation from 16% in the least deprived quintile to 34% in the most deprived quintile (Figure 2). The patterns were similar in the HSE although the proportion of ex-smokers was substantially larger across all levels of deprivation in the HSE compared to THIN.

1  
2  
3  
4  
5  
6  
7  
8  
9  
10 (Figure 2 here)  
11  
12  
13

#### 14 **Analyses imputing missing smoking status**

15  
16 After MAR MI of THIN, age-standardised smoking prevalences still differed  
17 somewhat between THIN and the HSE. For example, 22% were ex-smokers in  
18 THIN compared with 26% in the HSE; 25% were smokers in THIN, compared  
19 with 21% in the HSE (Table 2).  
20  
21  
22  
23

24  
25  
26 After MNAR MI of THIN (that is, regarding specifying that missing values as are  
27 either ex-smokers or non-smokers), the age-standardised prevalence of smoking  
28 in THIN was similar to that in the HSE (Table 2). However, the age-specific  
29 prevalence of ex-smokers was still greater in the HSE than in THIN. Age-specific  
30 analysis showed that this difference was greatest at older ages, and indeed  
31 reversed at younger ages. This suggested that individuals who had quit in the  
32 less recent past might be classified as non-smokers in THIN but as ex-smokers  
33 in HSE.(Figure 3).  
34  
35  
36  
37  
38  
39  
40  
41  
42  
43  
44  
45  
46  
47  
48  
49  
50  
51  
52  
53  
54  
55  
56  
57  
58  
59  
60



Table 2: Percentages within each smoking status for THIN and the HSE 2008 after various adjustments

| Category   | THIN                                 |                            |                             | HSE      |                                       |
|------------|--------------------------------------|----------------------------|-----------------------------|----------|---------------------------------------|
|            | Complete <a href="#">caserecords</a> | After MAR MI <sup>ab</sup> | After MNAR MI <sup>ac</sup> | Observed | Reclassifying ex-smokers <sup>d</sup> |
|            | %                                    | %                          | %                           | %        | %                                     |
| Non-smoker | 55                                   | 53                         | 57                          | 53       | 57                                    |
| Ex-smoker  | 17                                   | 22                         | 23                          | 26       | 22                                    |
| Smoker     | 28                                   | 25                         | 20                          | 21       | 21                                    |

Abbreviations: HSE Health Survey for England 2008; THIN The Health Improvement Network.

<sup>a</sup> Directly standardised using the HSE age distribution as standard.

<sup>b</sup> Imputed assuming that missing values are smokers, non-smokers or ex-smokers

<sup>c</sup> Imputed assuming that missing values are non-smokers or ex-smokers

<sup>d</sup> Within each age group, reclassifying the optimum number of ex-smokers as non-smokers based on the distributions shown after MNAR MI.

(Figure 3 here)

The median time since ex-smokers quit in the HSE varied greatly by age group (Table 3), from two years (Interquartile range (IQR): 0, 3) in the under 20s to 40 (IQR: 25, 51) years in those aged 90 or over (Table 3). Equating proportions of ex-smokers in THIN to that in the HSE data suggested the typical time-window after which patients are no longer regarded as ex-smokers in primary care, but instead regarded as non-smokers, varied with age. Thus, typically individuals who registered with a general practice when they were in their forties would no longer be recorded as an ex-smoker if they quit more than 22 years earlier (when they were between 18 and 27 years of age) (Table 3). Individuals registering in their seventies would typically no longer be recorded as ex-smokers if they quit 42 years earlier (when they were between the ages of 28 and 37 years) (Table 3). Yet, most individuals who quit after the age of 30 would still be captured as

ex-smokers when they later registered with a new general practice. Using these age-specific extrapolations to reclassify ex-smokers as non-smokers in the HSE according to when they quit, we can see that the age-specific distributions of ex-smokers in THIN and the reclassified HSE are similar (Figure 3).

Table 3: Age specific centiles of time since quitting smoking in the HSE 2008

| Age group | Median time since quitting (years) | Extrapolated number of years since quitting | Extrapolated age when they quit |
|-----------|------------------------------------|---------------------------------------------|---------------------------------|
| <20       | 2                                  | *                                           | *                               |
| 20-29     | 3                                  | *                                           | *                               |
| 30-39     | 5                                  | 14                                          | 16 - 25                         |
| 40-49     | 10                                 | 22                                          | 18 - 27                         |
| 50-59     | 20                                 | 30                                          | 20 - 29                         |
| 60-69     | 24                                 | 35                                          | 25 - 34                         |
| 70-79     | 30                                 | 42                                          | 28 - 37                         |
| 80-89     | 32                                 | 40                                          | 40 - 49                         |
| 90+       | 40                                 | 46                                          | 44+                             |

\*Not possible to assign an optimal value for reclassification to these age groups  
Abbreviations: HSE Health Survey for England 2008

## DISCUSSION

The proportion of newly registered patients in THIN between 2008 and 2009 with a record of being a smoker was slightly higher than the HSE in 2008. However, the proportion of individuals recorded as ex-smokers and non-smokers differed substantially between THIN and the HSE. Overall, a larger proportion of individuals were recorded as ex-smokers in the HSE than in THIN and this increased with age. Likewise, the proportion of ex-smokers was substantially larger across all levels of deprivation in the HSE compared to THIN.

1  
2  
3  
4  
5  
6  
7  
8 Under MAR MI there was a greater percentage of smokers (25%) and a smaller  
9 percentage of ex-smokers (22%) in THIN compared with the HSE (smokers 21%,  
10 ex-smokers 26%). However, ~~under~~-MNAR MI (assuming all missing data were  
11 either ex-smokers or non-smokers) slightly increased the proportion of non-  
12 smokers (57%) in THIN compared to the HSE (53%), whereas the proportion of  
13 ex-smokers (23%) was slightly lower in THIN. Moreover, the latter imputation  
14 resulted in a relatively larger percentage of ex-smokers in THIN in those aged  
15 under 30 years compared with the HSE. This may be because the imputation  
16 model was unable to distinguish between ex and non-smokers in those age  
17 groups as both are unlikely to have developed typical later onset diseases which  
18 are key predictors of smoking status in the imputation model.  
19  
20  
21  
22  
23  
24  
25  
26  
27  
28  
29  
30

31 There may be several reasons for the discrepancy in the distribution of the  
32 smoking categories between THIN and the HSE. In the HSE, the definition of an  
33 ex-smoker was highly sensitive and clearly defined.<sup>[2429]</sup> Thus respondents  
34 were categorised as ex-smokers even if they were a trivial smoker, smoked for a  
35 short period of time and/ or quit many decades ago. Also, the HSE used  
36 computer aided personal interviewing; where questions were read to the  
37 respondent in a standardised way from the screen and a detailed sequence of  
38 questions were asked to ascertain current smoking status. In primary care, while  
39 smoking status is systematically recorded in medical records, there is no detailed  
40 protocol for recording smoking status and the ascertainment is thus likely to vary  
41 by how the information was obtained. Many practices use self-report  
42  
43  
44  
45  
46  
47  
48  
49  
50  
51  
52  
53  
54

1  
2  
3  
4  
5  
6  
7  
8 questionnaires at registration including smoking status. Smoking status is then  
9 updated by health professionals (general practitioners and/ or practice nurses)  
10 during consultations where smoking status is often recorded as part of an  
11 assessment of current or future disease risk.  
12  
13  
14

15  
16  
17  
18 Our examination of the age-standardised data suggests that typically an ex-  
19 smoker in primary care settings is recorded as a non-smoker when they quit at a  
20 young age or had not smoked for a substantial time period. This could be  
21 because the patient may not volunteer previous smoking in either initial self-  
22 report questionnaire or on questioning by clinicians when it was minor, long ago  
23 or they consider it not relevant to their current or future health. It is possible that  
24 patients are more reluctant to volunteer ex-smoking habits when data are being  
25 held on their medical record and is not anonymous. However, comparing the  
26 proportion of individuals with a smoking record in THIN with that of the HSE we  
27 found a similar distribution suggesting that most smokers were identified in the  
28 first year of their registration in primary care. Similar findings have been  
29 observed in the literature by calendar year.<sup>[32,18]</sup> ~~While some studies suggest~~  
30 ~~underreporting of smoking among pregnant women in primary care~~<sup>[33]</sup> ~~we found~~  
31 ~~no evidence this was a general pattern.~~—With the introduction of the Quality and  
32 Outcomes Framework in 2004, there has also been increased incentive to  
33 identify smokers in relation to specific disease outcomes.<sup>[34,38, 35,39]</sup> Indeed we  
34 found in our previous study that those with respiratory and cardiac conditions  
35 were more likely to have any smoking status recorded within the first year of  
36  
37  
38  
39  
40  
41  
42  
43  
44  
45  
46  
47  
48  
49  
50  
51  
52  
53  
54  
55  
56  
57  
58  
59  
60

1  
2  
3  
4  
5  
6  
7  
8 registration.[13] Smoking status was validated in the HSE in 2007 by the use of  
9  
10 saliva cotinine samples and was found to be accurate[3640].  
11

12  
13  
14 The method of age standardisation then deducing the average time since quitting  
15 and reclassifying them to non-smokers in the HSE is relatively crude and  
16 assumes that everyone who becomes an ex-smoker does so at the same time in  
17 their lives as others in their age group. However, it may-is likely to be indicative  
18 of reporting of smoking status at the GP practice, given the results shown in this  
19 study.  
20  
21  
22  
23  
24  
25

26  
27  
28 An alternative method of dealing with unobserved smoking data is to dichotomise  
29 smoking status into current smokers and non-current smokers with missing data  
30 assumed to be non-current smokers. However, it should be noted that this  
31 solution may be to the detriment of some epidemiological studies where ex-  
32 smokers who quit recently are at greater risk of disease than non-smokers. For  
33 example, the 50 year follow up of male British doctors shows that ex-smokers  
34 had elevated age standardised mortality rates for many diseases.[37,3841, 42]  
35  
36  
37  
38  
39  
40  
41

42  
43 Our findings suggest that *in contrast* to health surveys, patients who quit smoking  
44 at a young age (before 25-30) are likely to be recorded by their general practice  
45 as a non-smoker instead of an ex-smoker. This has implications for researchers  
46 using these data sources. To our knowledge this is the first study which seeks to  
47 deduce and quantify typical time between when a smoker quit and when they are  
48  
49  
50  
51  
52  
53  
54

1  
2  
3  
4  
5  
6  
7  
8 no longer perceived as an ex-smoker in primary care. Clinicians, policy-makers  
9 and researchers who wish to use smoking status in primary care records to  
10 identify populations at risk of smoking-related diseases can be reassured by our  
11 findings that using data from new registrations, most current smokers will be  
12 identified and misclassification of ex-smokers is more likely to have occurred in  
13 those who have quit smoking at an early age and/ or a long time ago.  
14  
15  
16  
17  
18  
19  
20  
21  
22  
23  
24  
25  
26  
27  
28  
29  
30  
31  
32  
33  
34  
35  
36  
37  
38  
39  
40  
41  
42  
43  
44  
45  
46  
47  
48  
49  
50  
51  
52  
53  
54

1  
2  
3  
4  
5  
6  
7  
8 Figure Legends  
9

10 Figure 1: Smoking status percentages in THIN and the HSE 2008 by age group  
11

12 Figure 1 footnotes:

13 Solid line is the Health Survey for England 2008, dashed line is The Health  
14 Improvement Network (THIN)  
15

16  
17 Figure 2: Smoking status percentages in THIN and the HSE 2008 by deprivation  
18 quintile  
19

20 Figure 2 footnotes:

21 \*IMD 1 is the least deprived and IMD 5 is the most deprived

22 Darker bars represent the HSE 2008, lighter bars represent THIN

23 Abbreviations: HSE Health Survey for England 2008, IMD Index of multiple  
24 deprivation, THIN The Health Improvement Network  
25

26  
27 Figure 3: Age group specific percentages of ex-smokers in THIN (after MNAR  
28 imputation) and the HSE 2008 (before and after reclassifying ex-smokers in the  
29 HSE who quit before the age specified in Table 3 column 3 to be non-smokers)  
30

31 Figure 3 footnotes:

32 Abbreviations: THIN The Health Improvement Network, HSE Health Survey for  
33 England 2008  
34  
35  
36  
37  
38  
39  
40  
41  
42  
43  
44  
45  
46  
47  
48  
49  
50  
51  
52  
53  
54  
55  
56  
57  
58  
59  
60

### Conflict of interest and funding

The authors have no conflicts of interest to declare. This study is funded by a UK Medical Research Council grant [G0900701]. The funder had no influence over the study design, results or decision to publish this work. JRC was funded by a UK Economic and Social Research Council research fellowship grant [RES-063-27-0257]. IRW was funded by a United Kingdom Medical Research Council grant [U105260558].

### Author contributions

LM extracted and analysed the data and wrote the first draft of the paper with help from IP and JRC. KRW and IN provided clinical input and IRW and RWM provided additional statistical input. All authors commented on the paper and helped write subsequent drafts.

### Data sharing statement

No data are available

I Dr Louise Marston the Corresponding Author of this article contained within the original manuscript which includes any diagrams & photographs, other illustrative material, video, film or any other material howsoever submitted by the Contributor(s) at any time and related to the Contribution ("the Contribution") have the right to grant on behalf of all authors and do grant on behalf of all authors, a licence to the BMJ Publishing Group Ltd and its licensees, to permit this Contribution (if accepted) to be published in BMJ Open and any other BMJ Group products and to exploit all subsidiary rights, as set out in the licence at: ([http://group.bmj.com/products/journals/instructions-for-authors/BMJOpen\\_licence.pdf](http://group.bmj.com/products/journals/instructions-for-authors/BMJOpen_licence.pdf))



## References

1  
2  
3  
4  
5  
6  
7  
8  
9  
10  
11  
12  
13  
14  
15  
16  
17  
18  
19  
20  
21  
22  
23  
24  
25  
26  
27  
28  
29  
30  
31  
32  
33  
34  
35  
36  
37  
38  
39  
40  
41  
42  
43  
44  
45  
46  
47  
48  
49  
50  
51  
52  
53  
54  
55  
56  
57  
58  
59  
60

1 Office for National Statistics Opinions and Lifestyle Survey, Smoking Habits Amongst Adults, 2012; 2013 ([http://www.ons.gov.uk/ons/dcp171776\\_328041.pdf](http://www.ons.gov.uk/ons/dcp171776_328041.pdf)) (accessed January 2014)

2 Davies AR, Smeeth L, Grundy EMD. Contribution of changes in incidence and mortality to trends in the prevalence of coronary heart disease in the UK: 1996-2005. *Eur Heart J* 2007;2142-2147.

3 Delaney JAC, Daskalopoulou SS, Brophy JM et al Lifestyle variables and the risk of myocardial infarction in the general practice research database (electronic article). *BMC Cardiovasc Disord* 2007;38.

4 Douglas IJ, Smeeth L. Exposure to antipsychotics and risk of stroke: self controlled case series study (electronic article). *Br Med J* 2008;

5 Gelfand JM, Neimann AL, Shin DB et al Risk of myocardial infarction in patients with psoriasis. *JAMA* 2006;1735-1741.

6 Hippisley-Cox J, Coupland C, Vinogradova Y et al Derivation and validation of QRISK, a new cardiovascular disease risk score for the United Kingdom: prospective open cohort study. *Br Med J* 2007;136-141.

1  
2  
3  
4  
5  
6  
7  
8 7 Osborn DPJ, Levy G, Nazareth I et al Relative risk of cardiovascular and  
9 cancer mortality in people with severe mental illness from the United Kingdom's  
10 General Practice Research Database. *Arch Gen Psychiatry* 2007;242-249.  
11  
12

13  
14  
15  
16 8 Smeeth L, Thomas SL, Hall AJ et al Risk of myocardial infarction and stroke  
17 after acute infection or vaccination. *N Engl J Med* 2004;2611-2618.  
18  
19

20  
21  
22 9 Walters K, Rait G, Petersen I et al Panic disorder and risk of new onset  
23 coronary heart disease, acute myocardial infarction, and cardiac mortality: cohort  
24 study using the general practice research database. *Eur Heart J* 2008;2981-  
25 2988.  
26  
27  
28

29  
30  
31 10 Horsfall LJ, Rait G, Walters K et al Serum Bilirubin and Risk of Respiratory  
32 Disease and Death *JAMA* 2011;691-697  
33  
34

35  
36  
37 11 Kiri VA, Fabbri LM, Davis KJ et al Inhaled corticosteroids and risk of lung  
38 cancer among COPD patients who quit smoking *Respir Med* 2009;85-90  
39  
40  
41

42  
43 12 Horsfall LJ, Nazareth I, Petersen I. Cardiovascular Events as a Function of  
44 Serum Bilirubin Levels in a Large Statin-Treated Cohort. *Circulation* 2012;2556-  
45 2564  
46  
47  
48

1  
2  
3  
4  
5  
6  
7  
8  
9 13 Szatkowski L, Lewis S, McNeill A et al Is smoking status routinely recorded  
10 when patients register with a new GP? *Fam Pract* 2010;673–675

11  
12  
13  
14 14 Dhalwani NN, Tata LJ, Coleman T, Fleming KM, Szatkowski L Completeness  
15 of Maternal Smoking Status Recording during Pregnancy in United Kingdom  
16 Primary Care Data. *PLoS One* 2013;e72218

17  
18  
19  
20  
21  
22 [15 Szatkowski L, Lewis S, McNeill A et al Can data from primary care medical](#)  
23 [records be used to monitor national smoking prevalence? \*J Epidemiol\*](#)  
24 [Community Health](#) 2012;791-795.

25  
26  
27  
28  
29  
30 [16 Langley TE, Szatkowski LC, Wythe S, et al Can primary care data be used to](#)  
31 [monitor regional smoking prevalence? An analysis of The Health Improvement](#)  
32 [Network primary care data \*BMC Public Health\* 2011, 11:773](#)

33  
34  
35  
36  
37 ~~15-17~~ Coleman T, Lewis S, Hubbard R et al Impact of contractual financial  
38 incentives on the ascertainment and management of smoking in primary care.  
39 *Addiction* 2007;102:803e8.

40  
41  
42  
43  
44  
45 ~~16-18~~ Marston L, Carpenter JR, Walters KR et al Issues in multiple imputation of  
46 missing data for large general practice clinical databases *Pharmacoepidemiol*  
47 *Drug Saf* 2010;618–626

1  
2  
3  
4  
5  
6  
7  
8 | [17-19](#) Weiner MG, Barnhart K, Xie D et al Hormone therapy and coronary heart  
9 disease in young women. *Menopause* 2008;86-93.  
10  
11

12  
13  
14 | [18-20](#) Sterne JAC, White IR, Carlin JB et al. Multiple imputation for missing data  
15 in epidemiological and clinical research: potential and pitfalls. *Br Med J*  
16 2009;b2393  
17  
18  
19

20  
21  
22 | [21](#) Carpenter J, Kenward M. Multiple imputation and its application 2013 Wiley

Formatted: Font: (Default) Arial, 12 pt, Not Bold

23  
24  
25  
26 | [19-22](#) Hippisley-Cox J, Coupland C, Vinogradova Y et al Predicting  
27 cardiovascular risk in England and Wales: prospective derivation and validation  
28 of QRISK2. *Br Med J* 2008;1475-1482  
29  
30  
31

32  
33 | [20-23](#) Collins GS, Altman DG An independent and external validation of QRISK2  
34 cardiovascular disease risk score: a prospective open cohort study *Br Med J*  
35 2010;c2442  
36  
37  
38

39  
40  
41 | [21-24](#) The Health Improvement Network The Health Improvement Network.  
42 London: The Health Improvement Network; 2014 (<http://csdmruk.cegedim.com/>)  
43 (Accessed January 2014).  
44  
45  
46  
47  
48  
49  
50  
51  
52  
53  
54  
55  
56  
57  
58  
59  
60

1  
2  
3  
4  
5  
6  
7  
8  
9 [25 Horsfall L, Walters K, Petersen I. Identifying periods of acceptable computer  
10 usage in primary care research databases. \*Pharmacoepidemiol Drug Saf\* 2013;  
11 \[64-69\]\(#\)](#)

12  
13  
14  
15  
16 [26 Maguire A, Blak BT, Thompson M. The importance of defining periods of  
17 complete mortality reporting for research using automated data from primary  
18 care. \*Pharmacoepidem Drug Safe\* 2009; 76-83.](#)

19  
20  
21  
22  
23 [22-27](#) Lis Y, Mann RD The VAMP Research multi-purpose database in the U.K. *J  
24 Clin Epidemiol* 1995;431-443.

25  
26  
27  
28  
29 [23-28](#) Blak BT, Thompson M, Dattani H, ~~Bourke Aet al~~ Generalisability of The  
30 Health Improvement Network (THIN) database: demographics, chronic disease  
31 prevalence and mortality rates. *Inform Prim Care* 2011;251-255.

32  
33  
34  
35  
36  
37 [24-29](#) National Centre for Social Research and University College London.  
38 Department of Epidemiology and Public Health, *Health Survey for England, 2008*  
39 [computer file]. *2nd Edition*. Colchester, Essex: UK Data Archive [distributor],  
40 October 2010. SN: 6397

41  
42  
43  
44  
45  
46 [30 Booth N What are the Read Codes? \*Health Libr Rev\* 1994;177-82](#)

1  
2  
3  
4  
5  
6  
7  
8 [25-31](#) Noble M, Wright G, Dibben C et al Indices of Deprivation 2004. Report to  
9 the Office of the Deputy Prime Minister. London: Neighbourhood Renewal Unit;  
10 2004

11  
12  
13  
14 (<http://webarchive.nationalarchives.gov.uk/20120919132719/http://www.communi->  
15 [ties.gov.uk/documents/communities/pdf/131209.pdf](http://www.communities.gov.uk/documents/communities/pdf/131209.pdf)) (Accessed January 2014)  
16  
17

18  
19  
20 [32 Stata Corporation. Stata Statistical Software: Release 11. College Station, TX:](#)

21 [Stata Corporation; 2009](#)

22  
23  
24  
25  
26 [33 Royston P Multiple imputation of missing values: Update of ice. Stata Journal](#)  
27 [2005;527-536.](#)  
28  
29

30  
31  
32 [26-34](#) Spratt M, Carpenter J, Sterne JAC et al Strategies for Multiple Imputation  
33 in Longitudinal Studies *Am. J. Epidemiol.* 2010;478-487  
34  
35

36  
37  
38 [27-35](#) White IR, Royston P, Wood A Multiple imputation using chained equations:  
39 issues and guidance for practice (tutorial). *Stat Med* 2011;377-399  
40  
41

42  
43  
44 [28-36](#) Graham JW Missing data analysis: Making it work in the real world *Annu*  
45 *Rev Psychol* 2009;549-576  
46  
47

48  
49 ~~[29 Stata Corporation. Stata Statistical Software: Release 11. College Station, TX:](#)~~

50 ~~[Stata Corporation; 2009](#)~~  
51  
52  
53  
54

1  
2  
3  
4  
5  
6  
7  
8  
9  
10 ~~30 Royston P Multiple imputation of missing values: Update of ice. *Stata Journal*~~  
11 ~~2005;5:27-536.~~

12  
13  
14  
15  
16 ~~31-37~~ Rubin DB *Multiple imputation for non-response in surveys*. New York: John  
17 Wiley and Sons; 1987

18  
19  
20  
21  
22 ~~32 Szatkowski L, Lewis S, McNeill A et al Can data from primary care medical~~  
23 ~~records be used to monitor national smoking prevalence? *J Epidemiol*~~  
24 ~~*Community Health* 2011. doi:10.1136/jech.2010.120154~~

25  
26  
27  
28  
29 ~~33 Shipton D, Tappin DM, Vadiveloo T et al Reliability of self reported smoking~~  
30 ~~status by pregnant women for estimating smoking prevalence: a retrospective,~~  
31 ~~cross sectional study *Br Med J* 2009;b4347.~~

32  
33  
34  
35  
36  
37 ~~34-38~~ The British Medical Association and NHS Employers Quality and  
38 Outcomes Framework guidance for GMS contract 2011/12; 2011  
39 ([http://www.nhsemployers.org/Aboutus/Publications/Documents/QOF\\_guidance\\_](http://www.nhsemployers.org/Aboutus/Publications/Documents/QOF_guidance_GMS_contract_2011_12.pdf)  
40 [GMS\\_contract\\_2011\\_12.pdf](http://www.nhsemployers.org/Aboutus/Publications/Documents/QOF_guidance_GMS_contract_2011_12.pdf)) (Accessed January 2014)

41  
42  
43  
44  
45  
46  
47 ~~35-39~~ Campbell S, Reeves D, Kontopantelis E et al Quality of Primary Care in  
48 England with the Introduction of Pay for Performance *N Engl J Med* 2007;181-  
49 190

1  
2  
3  
4  
5  
6  
7  
8  
9  
10 | [36-40](#) Wardle H, Mindell J Adult cigarette smoking. In Craig R, Shelton N (Ed.),  
11 | Health Survey for England 2007. Volume 1. Healthy lifestyles: Knowledge,  
12 | attitudes and behaviour. 2008;149-176 NHS Information Centre.  
13  
14  
15  
16  
17

18 | [37-41](#) Doll R, Peto R, Boreham J et al Mortality in relation to smoking: 50 years'  
19 | observations on male British doctors *Br Med J* 2004,  
20 | doi:10.1136/bmj.38142.554479.AE  
21  
22  
23  
24  
25

26 | [38-42](#) Kenfield SA, Wei EK, Rosner BA et al Burden of smoking on cause-  
27 | specific mortality: application to the Nurses' Health Study *Tob Control* 2010;248-  
28 | 254  
29  
30  
31  
32  
33  
34  
35  
36  
37  
38  
39  
40  
41  
42  
43  
44  
45  
46  
47  
48  
49  
50  
51  
52  
53  
54  
55  
56  
57  
58  
59  
60



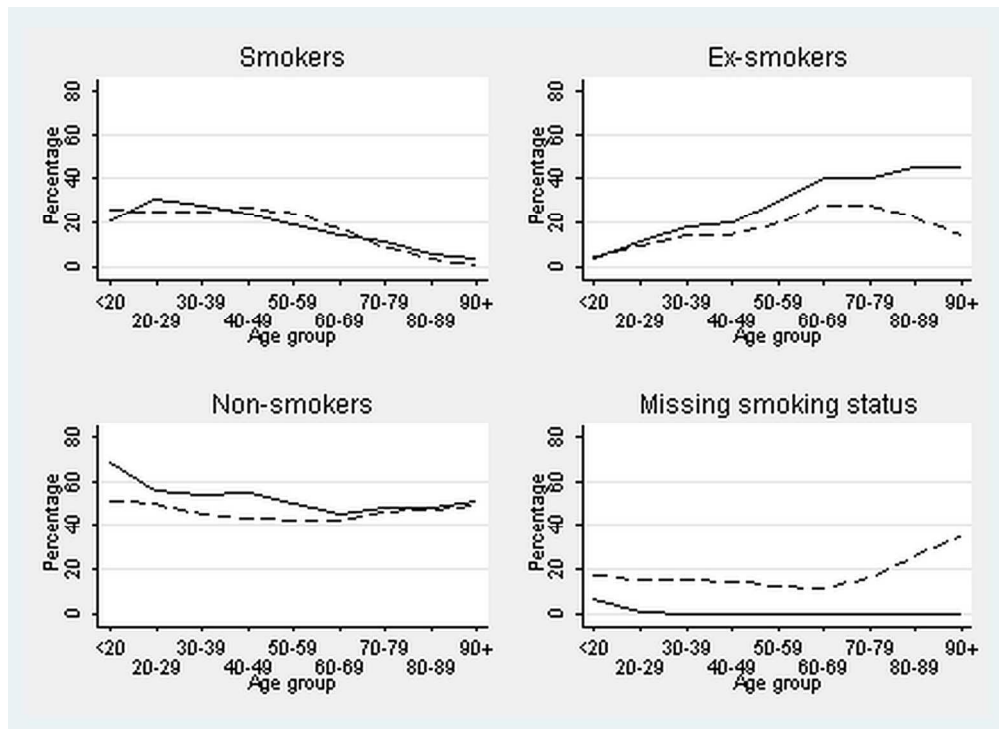

Figure 1: Smoking status percentages in THIN and the HSE 2008 by age group

Solid line is the Health Survey for England 2008, dashed line is The Health Improvement Network (THIN)

90x65mm (300 x 300 DPI)

ew only

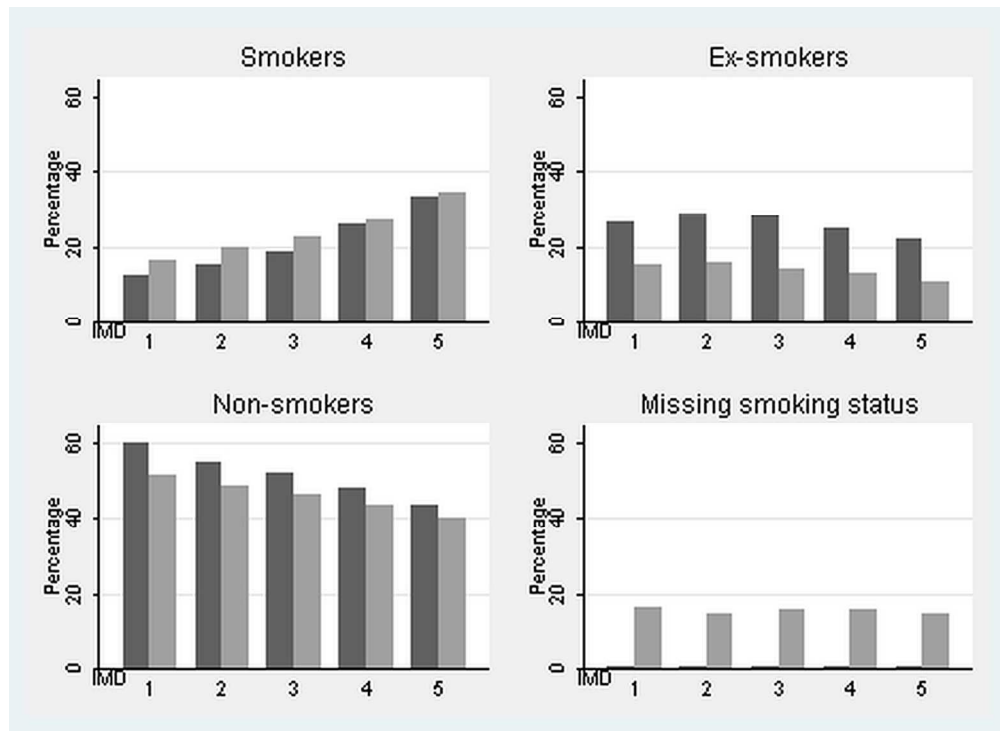

Figure 2: Smoking status percentages in THIN and the HSE 2008 by deprivation quintile

\*IMD 1 is the least deprived and IMD 5 is the most deprived

Darker bars represent the HSE 2008, lighter bars represent THIN

Abbreviations: HSE Health Survey for England 2008, IMD Index of multiple deprivation, THIN The Health Improvement Network

90x65mm (300 x 300 DPI)

only

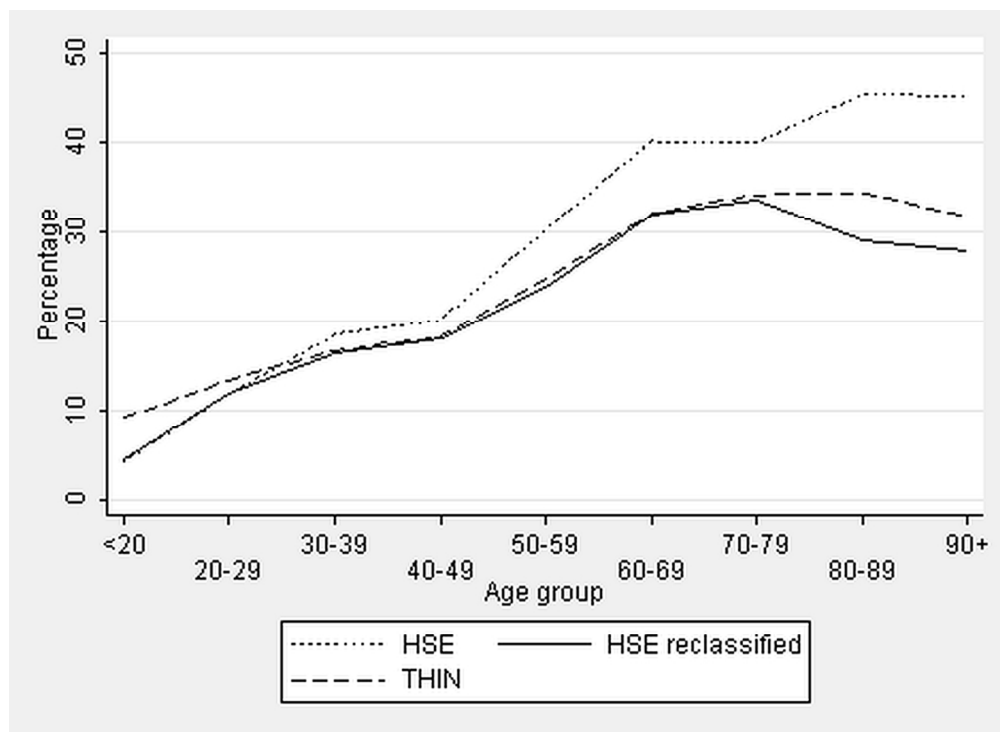

Figure 3: Age group specific percentages of ex-smokers in THIN (after MNAR imputation) and the HSE 2008 (before and after reclassifying ex-smokers in the HSE who quit before the age specified in Table 3 column 3 to be non-smokers)

Abbreviations: THIN The Health Improvement Network, HSE Health Survey for England 2008

90x65mm (300 x 300 DPI)

## Appendix 1

For the Health Survey for England 2008 analysis, we used the derived variable cigsta3. This is a three category variable non-smokers, ex-smokers, current smokers. It is derived from a number of questions asked in the Health Survey for England as follows:

If the participant

- Reported never smoking in the constituent questions (“May I just check, have you ever smoked a cigarette, a cigar or a pipe?”, “Have you ever smoked cigarettes?” (the latter only asked to those who have smoked but does not smoke cigarettes nowadays)), they were coded as a never regular smoker on this variable.
- Using: “Did you smoke cigarettes regularly, that is at least one cigarette a day, or did you smoke them only occasionally?”, if participants answered “regularly”, they are coded as an ex-smoker. If they responded “occasionally” or “only tried once or twice”, they were categorised as a never regular smoker
- If participants answered “yes” to “Do you smoke cigarettes at all nowadays?” this was taken as “current smoker” in the variable cigsta3.
- If participants gave no answer/ refused to any of the constituent questions, this was carried forward to cigsta3
- If participants responded don’t know to any of the constituent questions, this was carried forward to cigsta3
- If participants answered not applicable to “Do you smoke cigarettes at all nowadays?” this was carried forward to cigsta3.

National Centre for Social Research and University College London. Department of Epidemiology and Public Health, *Health Survey for England, 2008* [computer file]. *2nd Edition*. Colchester, Essex: UK Data Archive [distributor], October 2010. SN: 6397

STROBE 2007 (v4) Statement—Checklist of items that should be included in reports of *cross-sectional studies*

| Section/Topic                | Item # | Recommendation                                                                                                                                                                       | Reported on page # |
|------------------------------|--------|--------------------------------------------------------------------------------------------------------------------------------------------------------------------------------------|--------------------|
| Title and abstract           | 1      | (a) Indicate the study's design with a commonly used term in the title or the abstract                                                                                               | 1                  |
|                              |        | (b) Provide in the abstract an informative and balanced summary of what was done and what was found                                                                                  | 3-4                |
| <b>Introduction</b>          |        |                                                                                                                                                                                      |                    |
| Background/rationale         | 2      | Explain the scientific background and rationale for the investigation being reported                                                                                                 | 5-7                |
| Objectives                   | 3      | State specific objectives, including any prespecified hypotheses                                                                                                                     | 7                  |
| <b>Methods</b>               |        |                                                                                                                                                                                      |                    |
| Study design                 | 4      | Present key elements of study design early in the paper                                                                                                                              | 7-8                |
| Setting                      | 5      | Describe the setting, locations, and relevant dates, including periods of recruitment, exposure, follow-up, and data collection                                                      | 7-8                |
| Participants                 | 6      | (a) Give the eligibility criteria, and the sources and methods of selection of participants                                                                                          | 8                  |
| Variables                    | 7      | Clearly define all outcomes, exposures, predictors, potential confounders, and effect modifiers. Give diagnostic criteria, if applicable                                             | 8-10               |
| Data sources/<br>measurement | 8*     | For each variable of interest, give sources of data and details of methods of assessment (measurement). Describe comparability of assessment methods if there is more than one group | 8-10               |
| Bias                         | 9      | Describe any efforts to address potential sources of bias                                                                                                                            | 8                  |
| Study size                   | 10     | Explain how the study size was arrived at                                                                                                                                            | NA                 |
| Quantitative variables       | 11     | Explain how quantitative variables were handled in the analyses. If applicable, describe which groupings were chosen and why                                                         | 9-10               |
| Statistical methods          | 12     | (a) Describe all statistical methods, including those used to control for confounding                                                                                                | 9-11               |
|                              |        | (b) Describe any methods used to examine subgroups and interactions                                                                                                                  | 9-11               |
|                              |        | (c) Explain how missing data were addressed                                                                                                                                          | 9-11               |
|                              |        | (d) If applicable, describe analytical methods taking account of sampling strategy                                                                                                   | NA                 |
|                              |        | (e) Describe any sensitivity analyses                                                                                                                                                | NA                 |
| <b>Results</b>               |        |                                                                                                                                                                                      |                    |

|                          |     |                                                                                                                                                                                                              |       |
|--------------------------|-----|--------------------------------------------------------------------------------------------------------------------------------------------------------------------------------------------------------------|-------|
| Participants             | 13* | (a) Report numbers of individuals at each stage of study—eg numbers potentially eligible, examined for eligibility, confirmed eligible, included in the study, completing follow-up, and analysed            | 11    |
|                          |     | (b) Give reasons for non-participation at each stage                                                                                                                                                         | NA    |
|                          |     | (c) Consider use of a flow diagram                                                                                                                                                                           | NA    |
| Descriptive data         | 14* | (a) Give characteristics of study participants (eg demographic, clinical, social) and information on exposures and potential confounders                                                                     | 11-12 |
|                          |     | (b) Indicate number of participants with missing data for each variable of interest                                                                                                                          | 12    |
| Outcome data             | 15* | Report numbers of outcome events or summary measures                                                                                                                                                         | 12    |
| Main results             | 16  | (a) Give unadjusted estimates and, if applicable, confounder-adjusted estimates and their precision (eg, 95% confidence interval). Make clear which confounders were adjusted for and why they were included | 12-16 |
|                          |     | (b) Report category boundaries when continuous variables were categorized                                                                                                                                    | NA    |
|                          |     | (c) If relevant, consider translating estimates of relative risk into absolute risk for a meaningful time period                                                                                             | NA    |
| Other analyses           | 17  | Report other analyses done—eg analyses of subgroups and interactions, and sensitivity analyses                                                                                                               | NA    |
| <b>Discussion</b>        |     |                                                                                                                                                                                                              |       |
| Key results              | 18  | Summarise key results with reference to study objectives                                                                                                                                                     | 16    |
| Limitations              | 19  | Discuss limitations of the study, taking into account sources of potential bias or imprecision. Discuss both direction and magnitude of any potential bias                                                   | 17-19 |
| Interpretation           | 20  | Give a cautious overall interpretation of results considering objectives, limitations, multiplicity of analyses, results from similar studies, and other relevant evidence                                   | 17-18 |
| Generalisability         | 21  | Discuss the generalisability (external validity) of the study results                                                                                                                                        | 19    |
| <b>Other information</b> |     |                                                                                                                                                                                                              |       |
| Funding                  | 22  | Give the source of funding and the role of the funders for the present study and, if applicable, for the original study on which the present article is based                                                | 21    |

\*Give information separately for cases and controls in case-control studies and, if applicable, for exposed and unexposed groups in cohort and cross-sectional studies.

**Note:** An Explanation and Elaboration article discusses each checklist item and gives methodological background and published examples of transparent reporting. The STROBE checklist is best used in conjunction with this article (freely available on the Web sites of PLoS Medicine at <http://www.plosmedicine.org/>, Annals of Internal Medicine at <http://www.annals.org/>, and Epidemiology at <http://www.epidem.com/>). Information on the STROBE Initiative is available at [www.strobe-statement.org](http://www.strobe-statement.org).
